# Supplementary material for: Economic evaluation of Australian acute care accreditation (ACCREDIT-CBA (Acute)): study protocol for a mixed-method research project
Source: PubMed Central journal article supplement — BMJ Open. 2013 Feb 8;3(2):e002381. doi: 10.1136/bmjopen-2012-002381 (PMC3586127; doi:10.1136/bmjopen-2012-002381), 2013-02-08
Supplement: bmjopen-2012-002381.draft_revisions.pdf [file bmjopen-2012-002381.draft_revisions.pdf]

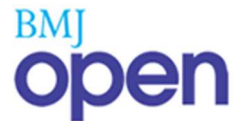

**Economic evaluation of Australian acute care accreditation (ACCREDIT-CBA [Acute]): study protocol for a mixed-method research project**

|                                 |                                                                                                                                                                                                                                                                                                                                                                                                                                                                                                                                                                                                                                                                                                                                                                                                                                                             |
|---------------------------------|-------------------------------------------------------------------------------------------------------------------------------------------------------------------------------------------------------------------------------------------------------------------------------------------------------------------------------------------------------------------------------------------------------------------------------------------------------------------------------------------------------------------------------------------------------------------------------------------------------------------------------------------------------------------------------------------------------------------------------------------------------------------------------------------------------------------------------------------------------------|
| Journal:                        | <i>BMJ Open</i>                                                                                                                                                                                                                                                                                                                                                                                                                                                                                                                                                                                                                                                                                                                                                                                                                                             |
| Manuscript ID:                  | bmjopen-2012-002381                                                                                                                                                                                                                                                                                                                                                                                                                                                                                                                                                                                                                                                                                                                                                                                                                                         |
| Article Type:                   | Protocol                                                                                                                                                                                                                                                                                                                                                                                                                                                                                                                                                                                                                                                                                                                                                                                                                                                    |
| Date Submitted by the Author:   | 20-Nov-2012                                                                                                                                                                                                                                                                                                                                                                                                                                                                                                                                                                                                                                                                                                                                                                                                                                                 |
| Complete List of Authors:       | Mumford, Virginia; University of New South Wales, Centre for Clinical Governance Research, Australian Institute of Health Innovation<br>Greenfield, David; University of New South Wales, Centre for Clinical Governance Research, Australian Institute of Health Innovation<br>Hinchcliff, Reece; University of New South Wales, Centre for Clinical Governance Research, Australian Institute of Health Innovation<br>Moldovan, Max; University of New South Wales, Centre for Clinical Governance Research, Australian Institute of Health Innovation<br>Forde, Kevin; School of Public Health and Community Medicine, Faculty of Medicine, University of New South Wales<br>Westbrook, Johanna; University of New South Wales, ORTON Research Institute<br>Braithwaite, Jeffrey; Centre for Clinical Governance Research, University of New South Wales |
| <b>Primary Subject Heading</b>: | Health services research                                                                                                                                                                                                                                                                                                                                                                                                                                                                                                                                                                                                                                                                                                                                                                                                                                    |
| Secondary Subject Heading:      | Health economics                                                                                                                                                                                                                                                                                                                                                                                                                                                                                                                                                                                                                                                                                                                                                                                                                                            |
| Keywords:                       | Health economics < HEALTH SERVICES ADMINISTRATION & MANAGEMENT, Clinical governance < HEALTH SERVICES ADMINISTRATION & MANAGEMENT, Health & safety < HEALTH SERVICES ADMINISTRATION & MANAGEMENT, Quality in health care < HEALTH SERVICES ADMINISTRATION & MANAGEMENT                                                                                                                                                                                                                                                                                                                                                                                                                                                                                                                                                                                      |
|                                 |                                                                                                                                                                                                                                                                                                                                                                                                                                                                                                                                                                                                                                                                                                                                                                                                                                                             |

SCHOLARONE™  
Manuscripts

1  
2  
3 **Economic evaluation of Australian acute care accreditation (ACCREDIT-CBA [Acute]): study**  
4 **protocol for a mixed-method research project**  
5

6 **ABSTRACT**  
7

8  
9 **Introduction:** The Accreditation Collaborative for the Conduct of Research, Evaluation and  
10 **Designated Investigations through Teamwork – Cost-Benefit Analysis (ACCREDIT-CBA [Acute])**  
11 study is designed to determine and make explicit, the costs and benefits of Australian acute care  
12 accreditation, and to determine the effectiveness of acute care accreditation in improving patient  
13 safety and quality of care. The cost-benefit analysis framework will be provided in the form of an  
14 interactive model for industry partners, health regulators and policy makers, accreditation agencies  
15 and acute care service providers.  
16  
17  
18  
19  
20  
21

22  
23 **Methods and Design:** The study will use a mixed-method approach to identify, quantify and  
24 monetise the costs and benefits of accreditation. Surveys, expert panels, focus groups, interviews,  
25 and primary and secondary data analysis will be used in cross-sectional and case study designs.  
26  
27  
28  
29

30 **Ethics and Dissemination:** The University of New South Wales Human Research Ethics Committee  
31 has approved this project (approval number HREC 10274). The results of the study will be reported  
32 via peer-reviewed publications, conferences and seminar presentations, and will form part of a  
33 doctoral thesis.  
34  
35  
36  
37  
38  
39  
40  
41  
42  
43  
44  
45  
46  
47  
48  
49  
50  
51  
52  
53  
54  
55  
56  
57  
58  
59  
60

**ARTICLE SUMMARY****Article focus**

- This study uses economic evaluation techniques to assess the costs and benefits of acute care accreditation in Australian health services. The objective is to provide an interactive model of the costs and benefits from the perspective of a broad range of stakeholders. The model can also be used to assess the effectiveness of accreditation in improving patient safety and quality of care.

**Key messages**

- Despite widespread implementation, the costs and benefits of acute care accreditation have not been clearly defined, identified and quantified.
- Economic evaluation techniques such as costs-benefit analysis can help determine whether accreditation is an effective driver of patient safety and quality of care.
- This protocol provides a unique specifically designed framework, and a number of purpose built tools, to systematically assess the costs and benefits of acute care accreditation.

**Strengths and limitations of this study**

- The strength of this study lies in using economic evaluation techniques to establish the role of acute care accreditation as an effective audit tool; this has not been accomplished previously.
- One limitation in determining the impact of accreditation in Australia is the lack of a suitable control group given the widespread implementation of accreditation.

## INTRODUCTION

Despite its widespread implementation, the costs and benefits of acute health services accreditation have not been clearly defined, identified and quantified.<sup>1-5</sup> An economic framework is needed to systematically assess and compare these costs and benefits. This study protocol applies economic evaluation techniques using a purpose-designed framework to accomplish this in acute care accreditation in Australia.

### Accreditation of acute health services in Australia

The International Society for Quality in Health Care (ISQua), the peak body for health services accreditation, defines accreditation as “public recognition of the achievement of standards by an organisation demonstrated through independent assessment in relation to set standards”.<sup>6,6</sup> Accreditation has been widely implemented following the establishment of the Joint Commission on Accreditation of Hospitals (now, the Joint Commission) in the United States (US) in 1951.<sup>7,8</sup> In Australia, accreditation was first adopted for acute care services in 1974,<sup>9</sup> with the Australian Council on Healthcare Standards (ACHS) as the main accrediting agency. Over subsequent years, ACHS developed the Evaluation and Quality Improvement Program (EQulP). This accreditation programme comprises two external surveys within a four year accreditation cycle.<sup>10</sup> Facilities are assessed by trained external surveyors using standards developed by ACHS in consultation with health care industry experts.<sup>10</sup> As part of wider health system reforms implemented by the Australian Commonwealth Government, recently approved legislation requires all hospitals and day procedure services in Australia to be assessed by an accreditation provider approved by the Australian Commission on Safety and Quality in Health Care (ACSQHC) using newly developed National Safety and Quality Health Service (NSQHS) standards.<sup>11</sup> Australian acute care accreditation is the focus of this study. We include acute and high risk inpatient activity in our definition of acute care facilities (ACFs) in this protocol.

### Economic evaluation of health interventions

Health costs are a significant proportion of gross domestic product, averaging 9.6% in 2010 for Organisation for Economic and Co-operation Development countries.<sup>12</sup> This, combined with persistent

1  
2  
3 evidence of harm during health service delivery,<sup>13-16</sup> has resulted in an increasing international focus  
4 on accountability and safety in health care.<sup>17 18</sup> Economic evaluation addresses these issues by using  
5 a systematic framework to identify and compare the costs and benefits of a policy or intervention to  
6 determine whether implementation is effective in achieving stated aims, and also to compare different  
7 policy proposals and interventions.<sup>19-21</sup> In cost-benefit analysis (CBA) the costs and benefits are each  
8 expressed in monetary terms. This contrasts with other techniques such as cost-effectiveness  
9 analysis (CEA) or cost-utility analysis (CUA) which are used in assessing health technologies. In CEA  
10 and CUA the common outcome denominator is not monetised but expressed in terms of a common  
11 utility measure such as Quality Adjusted Life Years.<sup>22-25</sup> CBA is advocated where there is broader  
12 range of outcomes, and is usually a requirement for submitting a regulatory impact statement for  
13 Australian government approval.<sup>19</sup> CBA seems justified as the most appropriate model to use in an  
14 Australian health services context as the NSQHS standards cover both organisational and clinical  
15 outcomes, which are best measured using a common monetary denominator. Although CBA can be  
16 used as an allocative efficiency tool for comparing different projects, the requirement to make the  
17 costs and benefits explicit in the analysis framework can help clarify the goals, costs and benefits,  
18 providing input into the design of future accreditation systems in healthcare.<sup>26</sup>

19  
20  
21  
22  
23  
24  
25  
26  
27  
28  
29  
30  
31  
32  
33  
34 Modelling the costs and benefits of a complex intervention, such as accreditation, in a complex  
35 system, such as an ACF, is a significant undertaking.<sup>27</sup> Given the lack of precedent discussed above,  
36 we have developed a unique framework, and a number of purpose-built tools specifically designed for  
37 evaluating acute care accreditation. Our SIQNS framework is synthesized from several sources,<sup>20 21 28</sup>  
38 and comprises five discrete activities: 1) **S**cope and objectives; 2) **I**dentify costs and benefits; 3)  
39 **Q**uantify costs and benefits; 4) calculate **N**et social benefits; and 5) **S**ensitivity analysis (Figure 1).

40  
41  
42  
43  
44  
45 **Figure 1: SIQNS framework**

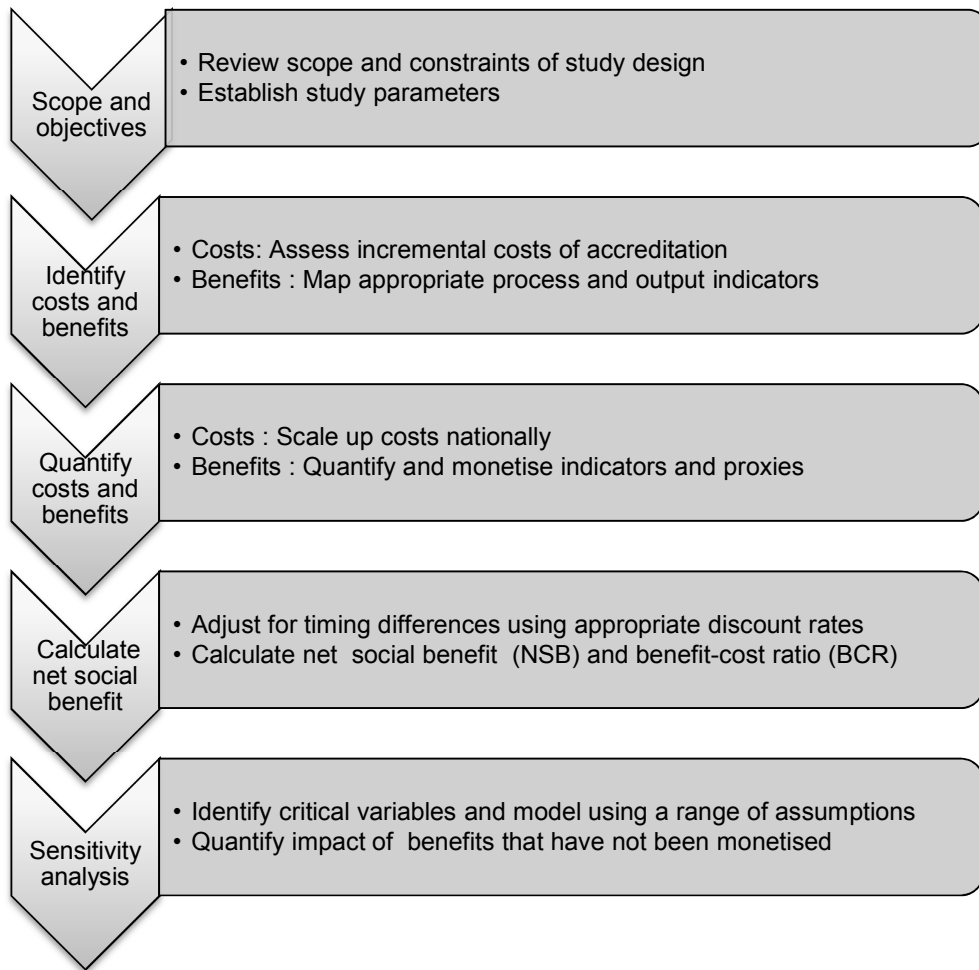

### Scope and objectives

The aim of the study is to create an interactive model that can be accessed by health service providers, accreditation bodies, quality and safety agencies, governments, and researchers to both test the assumptions in the model, and to determine the cost-benefit calculations of acute care accreditation at both a national and local service level.<sup>28</sup> The lack of research in this field, and complexity of both the intervention (accreditation) and system (acute health care), indicates that an important objective will be to make explicit the costs and benefits of accreditation.<sup>1 2 27 29 30</sup>

Establishment of the study parameters will be informed by a review of the research literature and analysis of the characteristics of accredited ACFs. These activities will also help determine the indicator selection process to identify and quantify the benefits of accreditation. A critical element is in identifying the stakeholders involved in the acute care accreditation process. Although accreditation

1  
2  
3 agencies and ACFs are the most obvious groups affected, a broader societal framework is required  
4 when assessing regulatory impact to ensure equity and impact are meaningfully accounted for in the  
5 analysis.<sup>20</sup>  
6  
7

8  
9  
10 Our initial analysis has identified a key constraint, in that ACFs do not account for accreditation  
11 activities as a separate cost item.<sup>31</sup> Our approach, outlined below, is to accept that large scale data  
12 gathering on costs would not be possible within the scope of the study and will be a challenge over  
13 time. Instead we will use a smaller study sample and have this validated by an expert panel.  
14 Accreditation benefits, in terms of both clinical and organisational outcomes, are more likely to be  
15 assessed using secondary data but are more difficult to identify partly due to a lack of clarity in terms  
16 of measurable endpoints. In addition a full impact analysis of all benefits for all stakeholders will be  
17 outside the study scope. A further constraint is that an economic appraisal would ideally be conducted  
18 with a control group (either randomly assigned or with data collected for a before and after  
19 comparison) in order to compare different outcomes.<sup>32</sup> This is not possible in Australia where acute  
20 care accreditation is widely implemented (93% of public hospital beds in 2010, and 84% of private  
21 hospital beds in 2008-2009).<sup>33</sup> However, we can analyse data before and after introduction of new  
22 standards, review indicator activity against accreditation scores, and analyse changes over time.  
23  
24  
25  
26  
27  
28  
29  
30  
31  
32  
33  
34  
35

### 36 **Identify costs and benefits**

37  
38 To identify the incremental costs of accreditation, we need to determine costs that are only incurred  
39 due to the accreditation process.<sup>34</sup> We will first review the stakeholders for potential costs and exclude  
40 transfer payments to avoid double counting. We will then assess costs for a small number of ACFs  
41 (n=10) using our purpose designed assessment tool based on questions posed in similar cost  
42 surveys,<sup>35-38</sup> and the Business Cost Calculator which has been designed to help Australian  
43 businesses compute business compliance costs.<sup>7 10 39 40</sup>  
44  
45  
46  
47  
48  
49  
50

51 International accreditation agencies, e.g., the Joint Commission, ACHS and Accreditation Canada,  
52 identify improvements in patient safety and quality of care as the main benefits of health services  
53 accreditation.<sup>7 10 40</sup> Within an Australian context we reviewed the benefits outlined by ACSQHC in a  
54 recent regulatory impact statement on the new NSQHS standards.<sup>41</sup> In addition the Australian  
55  
56  
57  
58  
59  
60

1  
2  
3 National Health Performance Authority's (NHPA's) performance and accountability framework has  
4 defined the indicators used to assess effectiveness of care in ACFs. We will map our stakeholder  
5 analysis with the ACSQHC benefits and the NHPA adverse and sentinel event measures to identify  
6 quality and safety indicators.  
7  
8  
9

10  
11  
12 In our choice of indicators we need to distinguish whether a lack of change in the indicator is due to a  
13 lack of compliance with the accreditation standard, or whether compliance with the standard results in  
14 change in an indicator. We have adapted the approach used in measuring quality outcomes in US  
15 hospitals.<sup>42</sup> This recommends that indicators must meet four key accountability criteria: research –  
16 robust evidence; accuracy – whether the process has been carried out satisfactorily; proximity – a  
17 clear and direct link between accreditation and the indicator; and, no adverse effects – no unintended  
18 or unwanted actions. As accreditation is usually just one facet of a quality and safety framework, we  
19 have added a further criterion – specificity – to determine how easy it is to isolate the effects of  
20 accreditation from other safety and quality measures. This is important when determining the  
21 effectiveness of accreditation versus other safety and quality initiatives.<sup>43</sup> We specify the type of  
22 indicator, as process indicators are often a preferred measure of quality over outcome indicators. This  
23 is due to a more direct link between the indicator and the process being measured (the issue of  
24 proximity in Chassin's accountability criteria)<sup>42</sup> but this can also lead to estimation problems as only a  
25 narrow range of factors are considered. Outcome indicators have the advantage in that the data are  
26 often collected routinely but may need to be adjusted for other factors such as patient acuity and  
27 complexity.<sup>43-45</sup> We will need to consider whether the chosen indicators need to be weighted to reflect  
28 both suitability (in terms of adherence to the accountability criteria), and applicability (quality of data  
29 collection and adjustment for patient mix). We will ask an expert panel to review and validate our  
30 indicator selections prior to quantifying the indicators for further analysis.  
31  
32  
33  
34  
35  
36  
37  
38  
39  
40  
41  
42  
43  
44  
45  
46  
47  
48

### 49 **Quantify costs and benefits**

50  
51 Once the costs have been identified for each ACF in our sample, we will need to ensure the results  
52 can be scaled up and assessed on a national basis. Although costs for initial accreditation can be  
53 higher than for ongoing accreditation,<sup>38 46</sup> we assume ongoing accreditation costs for our sample, but  
54 include questions on estimating the cost of implementing the new national standards in the survey.  
55  
56  
57  
58  
59  
60



1  
2  
3 Under a CBA model we use monetary values as the common denominator so will need to monetise  
4 the benefits identified. The techniques used will depend on the availability of pricing and market data.  
5  
6 For example, clinical outcome indicators (such as hospital acquired infection rates, or complications  
7 resulting from inpatient falls) can be matched to activity-based costing codes. This data can be used  
8 to determine the potential cost savings from a reduction in infection or fall rates. Where we identify an  
9 indicator but do not see a change in measurement, we will include this in our sensitivity analysis, for  
10 example, the costs associated with reducing hospital acquired infections by a stated amount. Where  
11 indicators can be identified and quantified but lack pricing or market data, we will monetise the effects  
12 using techniques such as revealed and stated preference methods, where possible.<sup>21 26 47</sup>

### 21 **Calculate net social benefit**

22  
23 Given the costs and benefits are likely to occur at different times, we will need to adjust the timing  
24 differentials using an appropriate discount rate. For CBA both the net social benefit (NSB) and  
25 benefits-cost ratio (BCR) are calculated. The NSB uses a net present value method to derive an  
26 absolute measure of whether the discounted (net) benefits are greater than the discounted (net) costs  
27 when assessing proposals in a regulatory impact statement.<sup>19 22</sup> The BCR is derived by dividing the  
28 net benefits by the net costs to determine an effective return on the costs and is used where the  
29 absolute size of the investment is a determining factor, for example in a resource constrained  
30 environment. However, the BCR is subject to more variation depending on how the outcomes are  
31 treated.<sup>19 20 22</sup>

32  
33  
34 With questions on the table about whether accreditation is more of an audit tool or quality  
35 improvement tool,<sup>1 8</sup> CBA can address both these issues by not only comparing accreditation with  
36 other safety and quality programmes, but also with other methods of regulatory compliance. Although  
37 there is not a good counterfactual to accreditation due to widespread implementation,<sup>33</sup> we can  
38 estimate the relative effectiveness of accreditation versus alternative forms of audit. Examples include  
39 the additional requirements that a private ACF would need to meet to qualify for private health  
40 funding, or additional auditing that would be required for public ACFs in the absence of accreditation.

### 56 **Sensitivity analysis**

1  
2  
3 A sensitivity analysis is an essential tool to describe the impact of changes in assumptions and  
4 variables on our SIQNS framework,<sup>20</sup> especially given the constraints discussed. We will review the  
5 assumptions in the model and run the NSB and BCR calculations over a range of values. For some  
6 costs and benefits, including qualitative outcomes, monetisation will be beyond the scope of this study  
7 and these items will not be included in the NSB or BCR calculations. Nevertheless, these costs and  
8 benefits can still be included in the final model and used to compare other programmes with similar  
9 NSB or BCR outcomes but where the non-monetised items may be a deciding factor.

### 17 **ACCREDIT project overview**

18  
19 The ACCREDIT CBA [Acute] study is the sixth of 12 studies under the ACCREDIT (Accreditation  
20 Collaborative for the Conduct of Research, Evaluation and Designated Investigations through  
21 Teamwork) research collaboration,<sup>28 48 49</sup> funded by the Australian Research Council through its  
22 industry Linkage Program.<sup>50</sup> The ACCREDIT collaboration involves researchers in the Centre for  
23 Clinical Governance Research and Centre for Health Systems and Safety Research in the Australian  
24 Institute of Health Innovation (AIHI) at the University of New South Wales (UNSW), Australia. The  
25 ACCREDIT research team benefits from a high-profile international advisory group containing leading  
26 researchers in health safety and quality from the United Kingdom, Spain and Sweden. The  
27 collaboration includes two leading health safety and quality bodies (ACSQHC and the Clinical  
28 Excellence Commission [CEC]) plus three of the major Australian health services accreditation  
29 agencies: ACHS, Australian General Practice Accreditation Limited (AGPAL), and the Aged Care and  
30 Standards Accreditation Agency (ACSAA).

### 43 **METHODS AND ANALYSIS**

44  
45 The methods to obtain and analyse data needed to build the CBA model are discussed below using  
46 each of the five SIQNS activities. For each survey tool, focus group, and expert panel described in the  
47 following sections, the ACCREDIT research team will send an electronic invitation to potential  
48 participants containing the study information and consent forms approved by the UNSW Human  
49 Research Ethics Committee (HREC).<sup>51</sup> Those individuals wishing to participate will be asked to  
50 contact the UNSW research team and will be invited to either attend the relevant research activity. at  
51 UNSW, or be interviewed via telephone. The research activities will last approximately one hour, and  
52  
53  
54  
55  
56  
57  
58  
59  
60

1  
2  
3 will be digitally recorded and professionally transcribed.  
4  
5

### 6 **SIQNS activity 1: scope and objectives**

7  
8 The first activity is to review the scope and constraints of the study design, and to establish the study  
9 parameters. This will be completed through three tasks: literature reviews; analysis of accredited  
10 ACFs; and stakeholder identification.  
11  
12

13  
14 A literature review covering two general issues will be conducted. First, an investigation of the cost  
15 and benefits of accreditation, in health and related fields, and second, the compliance costs and  
16 methodologies used in non-health industries.  
17  
18  
19  
20

21  
22 Analysis of accredited ACFs will be conducted using data from the ACHS national accreditation  
23 database, using accreditation survey data from 2003 to 2011. The purpose is to assess the  
24 characteristics of accredited ACFs (bed size, ownership and funding structure, geographic location  
25 (by state or territory), type of survey and whether these are linked to accreditation outcomes. During  
26 2007 ACHS made changes to the mandatory criteria assessed in the surveys with the changeover  
27 from EQuIP3 to EQuIP4. Therefore, econometric analysis of the main study variables will be over the  
28 full period (2003-2011), accompanied by analysis of individual standards as predictors of accreditation  
29 outcomes in the different EQuIP programmes. This part of the study will provide guidance for  
30 reviewing the structure of the ACFs targeted in the costs study.  
31  
32  
33  
34  
35  
36  
37  
38  
39  
40

41 To evaluate the stakeholder base, the ACCREDIT research team will send an electronic invitation to  
42 senior health services researchers at AIHI, UNSW, to participate in a focus group.<sup>52</sup> Those willing to  
43 participate will be asked to contact the ACCREDIT team. The focus group will take place at UNSW  
44 using the general demographic and content questions from the Stakeholder Analysis Tool (Table 1).  
45  
46  
47  
48  
49  
50

51 **Table 1: Stakeholder Analysis Tool**

52 General demographic questions

- 53 • What is your age?
  - 54 • What is your gender?
  - 55 • What are your highest qualifications?
- 56  
57  
58  
59  
60

- What is your research discipline?
- How many years have you worked in health services research?
- How many years have you worked as a healthcare professional?
- How many first author peer- reviewed publications do you have?
- How many second or subsequent author publications do you have?

Content questions

1. Who are the key stakeholders in acute health care in Australia?
2. Please classify these as either:
  - a) Key stakeholders in acute care services who either contribute to, or influence, the costs and benefits of accreditation; or
  - b) Key stakeholders in acute care services who do not contribute directly to accreditation costs or benefits
3. Please identify the costs and benefits for each stakeholder identified in 2. a)

In keeping with the tenets of an inclusive societal framework,<sup>53</sup> stakeholders from group 2a) will be included in the list of identified stakeholders. Those in group 2b) will be closely reviewed for inclusion based on their knowledge and perspective. The group of identified stakeholders will be used throughout the study and referenced when considering the individual costs and benefits to ensure the broader social framework is addressed.

**SIQNS activity 2: identify costs and benefits**

The aim of this activity is to estimate the incremental costs and the benefits of accreditation using a variety of purpose-built tools to both assess and validate our results. One of the main costs identified in previous research has been the preparation for external surveys in the accreditation cycle.<sup>9 35-38 54</sup>

To recruit subjects in the sample survey to assess incremental costs, the UNSW research team will send an invitation to participate in the study to the accreditation partners to forward on to the ACFs they accredit. The ACFs agreeing to participate will be characterised according to: facility specialisation (for example, teaching hospital); location (metropolitan or rural); and size (large, medium or small). One from each category (n=10) will be randomly selected and approached by the UNSW research team. Semi-structured interviews will be conducted with Finance Managers, Quality Managers, and General Managers as directed by the ACF, using the questions set out in the Incremental Costs Audit Tool (Table 2).

**Table 2: Incremental Costs Audit Tool**

1. Demographic details:
  - a. Bed size of facility
  - b. Location (State or Territory, and whether rural or metropolitan)
  - c. Funding structure (public or private)
  - d. Specialisation of the facility (e.g. teaching hospital, mental health, correctional facility or other)
  - e. Job description of respondent
2. Is this your first accreditation cycle?
3. Please provide details, where possible by year incurred, of activity based costing for the following activities in relation to the accreditation cycle:
  - a. Notification: implementing recommendations from the survey
  - b. Education: staff meetings, working groups and education sessions for new staff, and to accommodate changes in standards
  - c. Record-keeping: developing and maintaining policies and documents
  - d. Enforcement: staff allocated to assist surveyors, and in pre and post survey briefings
  - e. Publication and documentation: survey and self-assessment preparation
  - f. Procedural: collecting consumer feedback relating to accreditation standards
  - g. Other: details of staff involved in surveying other facilities
  - h. Purchases: survey fees and consultancy fees relating to accreditation
4. What do you estimate will be the difference in costs (if any) for complying with the new National Safety and Quality Health Service Standards?

Given the relatively small size of the survey sample we will validate the results using an expert panel consisting of: accreditation surveyors; leading accreditation researchers; accreditation agencies; health quality consultants; and government health quality improvement agencies. We will also invite staff and surveyors from ACFs who agreed to participate, but not selected for interviews, to take part in the panel. A de-identified costs summary will be given to participants in advance, and the panel will be asked to discuss the questions set out in the Incremental Costs Validation Tool (Table 3).

**Table 3: Incremental Costs Validation Tool**

1. Do you think the results from the audit tool are representative of the current accreditation process?
2. If these costs are not representative, what is your estimate of the costs?

3. Are there other incremental costs that have not been included?
4. What would be your estimate of costs identified in question 3?

The outcomes of both the incremental costs audit and validation tools will be assessed against results of the stakeholder analysis. Total costs will be estimated at a national level.

To determine the specific benefits of accreditation we will use our Indicator Assessment Tool (Table 4) to identify the main topics in both the ACHS EQulP5 survey and the new NSQHS standards. We will then review a range of process and outcome indicators including adverse events highlighted in the NHPA framework,<sup>55</sup> as well as the outcome indicators and sentinel events collected by the Australian Institute of Health and Welfare.<sup>56 57</sup>

| <b>Table 4: Indicator Assessment Tool</b> |                                                                                                                   |
|-------------------------------------------|-------------------------------------------------------------------------------------------------------------------|
| <b>Intervention Topic</b>                 |                                                                                                                   |
| <b>Accreditation Standards</b>            | List relevant standards relating to the intervention topic                                                        |
| ACHS EQulP5                               | Whether the intervention is a mandatory criteria in EQulP5                                                        |
| NSQHS Standards                           | Whether the intervention is included in the new NSQHS standards                                                   |
| <b>Indicator</b>                          | Description of indicator                                                                                          |
| <b>Indicator type</b>                     | Whether the indicator is process or outcome based                                                                 |
| <b>Research</b>                           | What is the evidence base that compliance with the standard affects the indicator?                                |
| <b>Accuracy</b>                           | How accurate is the indicator in terms of measuring compliance with the accreditation standard?                   |
| <b>Proximity</b>                          | How close is the link between the standard and the indicator, is there a causal chain?                            |
| <b>No adverse effects</b>                 | What is the risk of avoiding adverse effects?                                                                     |
| <b>Specificity</b>                        | It is possible to isolate the effects of accreditation on the indicator from other safety and quality programmes? |
| <b>Associate programmes</b>               | Related programmes initiated by state or federal governments, or healthcare agencies                              |

The results of our indicator selection process will be validated using the established expert panel. A

1  
2  
3 summary of the potential indicators and scores from the Indicator Assessment Tool will be given to  
4 participants in advance of the panel. The interviews with the panel will use the semi-structured  
5 questions in the Indicator Validation Tool (Table 5).  
6  
7  
8  
9

10 **Table 5: Indicator Validation Tool**

- 11  
12 1. Do you think the indicators selected using the Indicator Assessment Tool are representative of the benefits  
13 of accreditation?  
14  
15 2. If these are not representative, what indicators would you add, and why?  
16  
17 3. For the indicators you have identified, would you recommend attaching a weighting to the monetized values,  
18 and if so what weighting would you recommend?  
19

20  
21 The results of the panel will be used to formulate a list of benefit indicators. These will then be  
22 mapped to appropriate databases to look for evidence of improvement over accreditation cycles or  
23 following introduction of a relevant standard. Indicators with low scores from the Indicator Assessment  
24 Tool, especially for the proximity and specificity criteria, will be evaluated for inclusion or rejection.  
25  
26  
27  
28  
29

### 30 **SIQNS activity 3: quantify costs and benefits**

31  
32 Costs will be scaled up nationally according to facility-type both by an actual dollar amount and as a  
33 percentage of total costs. Identified benefits will be quantified and monetised using a number of  
34 techniques depending on the type of indicators validated by our expert panel. For example, clinical  
35 outcome indicators can be matched to the ACSQHC's Costs of Hospital Acquired Diagnoses activity  
36 based costing codes.<sup>58 59</sup> Process measures are more difficult to quantify but techniques for valuing  
37 non-market costs such as revealed and stated preference will be used to monetise the benefits where  
38 possible.<sup>21 22 47</sup>  
39  
40  
41  
42  
43  
44  
45  
46  
47

### 48 **SIQNS activity 4: calculate net social benefit**

49  
50 Our interactive CBA model will be populated with the costs and benefits identified and quantified in  
51 SIQNS activities 2 and 3. Costs will be added to the model and allocated by year incurred during the  
52 accreditation cycle. The benefits will be allocated depending on the type of indicator used. For  
53 example, for clinical indicators such as hospital acquired infection rates, the cost savings from a  
54  
55  
56  
57  
58  
59  
60

reduction in infection rates per year nationally can be monetised and modelled. Where the timing is not clear we will assign equal weights over the expected time horizon and discount accordingly. Australian Government approved discount rates will be applied to the model in order to discount the cost and benefit cash flows back to a baseline year.<sup>19 60</sup> Both the NSB and BCR (Equations 1 and 2) will be calculated for the costs and benefits that have been monetised. Non-monetised costs and benefits will be included for comparative analysis if they can be quantified.

$$\text{Equation 1: NSB} = \sum_{t=1}^n \frac{(B_t - C_t)}{(1 + r)^t}$$

$$\text{Equation 2: BCR} = \frac{\sum_{t=1}^n B_t / (1 + r)^t}{\sum_{t=1}^n C_t / (1 + r)^t}$$

**Legend for Equation 1 and 2:**  $B_t$  is the sum of benefits in year  $t$ ;  $C_t$  is sum of costs in year  $t$ ;  $n$  is the lifetime of the accreditation cycle or expected time horizon, in years; and  $r$  is the discount rate used.

#### **SIQNS activity 5: sensitivity analysis**

In order to determine the sensitivity of inputs into the model, NSB and BCR will be recalculated for range of values (plus and minus 1%, 5% and 10% of the total values) for each individual cost and benefit that is more than 10% of the total. In addition, the model will be run with discount rates at plus and minus two and five percentage points from the base discount rates used in order to test the duration sensitivity of the model.

#### **ETHICS AND DISSEMINATION**

The UNSW HREC has approved the ACCREDIT-CBA (Acute) study proposal (approval number HREC 10274). The study will be conducted in accordance with the UNSW Research Code of Conduct and Australian National Health and Medical Research Council (NHMRC) guidelines.<sup>61 62</sup> As such, all project data will be de-identified prior to publication and stored securely for a minimum of seven years. Contact details of the research team will be given to participants in the study so that any complaints or concerns can be addressed. The results of the study will be submitted for publication in selected journals and presented to national and international conferences and seminars. The findings will also form part of a doctoral thesis.



**CONCLUSION**

Although accreditation of acute health services has been widely adopted in Australia, little is currently known about the costs and benefits of the process, and whether accreditation is a cost-effective tool in improving patient safety and quality of care. This study aims to make these costs and benefits explicit in order to inform debate on the important issue of how best to monitor and improve patient safety and quality of care in acute health services.

**ACKNOWLEDGEMENTS:** We acknowledge the staff of the industry partners (ACHS, AGPAL, ACSAA) and the quality improvement agencies (ACSQHC and CEC) who are providing support for the project.

**COMPETING INTERESTS:** The authors have no competing interests to declare.

**FUNDING AND ETHICS:** This research is supported under the Australian Research Council's Linkage Projects scheme (project LP100200586), and NHMRC Program grant number 568612. Although the ARC and NHMRC have contributed to funding the research, the final responsibility for all research activities, including the decision to publish the results of the studies, resides with UNSW. Ethics approval was granted by the UNSW Human Research Ethics Committee (approval number HREC 10274).

**AUTHORS' CONTRIBUTIONS:** All authors contributed to the writing of the protocol and will assist in the conduct of the project.

## REFERENCES

1. Shaw CD. Evaluating accreditation. *International Journal for Quality in Health Care* 2003;15(6):455-56.
2. Braithwaite J, Greenfield D, Westbrook J, Pawsey M, Westbrook M, Gibberd R, et al. Health service accreditation as a predictor of clinical and organisational performance: a blinded, random, stratified study. *Quality & Safety in Health Care* 2010;19(1):14-21.
3. Greenfield D, Pawsey M, J. B. The role and impact of accreditation on the healthcare revolution [O papel e o impacto da acreditação na revolução da atenção à saúde]. *Acreditação*, 2012;1(2):64-67.
4. Greenfield D, Braithwaite J. Health sector accreditation research: a systematic review. *International Journal for Quality in Health Care* 2008;20(3):172-83.
5. Hinchcliff R, Greenfield D, Moldovan M, Westbrook JI, Pawsey M, Mumford V, et al. Narrative synthesis of health service accreditation literature. *Quality and Safety in Health Care*. Published Online First, 4 October 2012 : doi: 10.1136/bmjqs-2012-000852.
6. ISQuA. The International Society for Quality in Health Care Ltd - Articles of Association, 2011.
7. The Joint Commission. Benefits of Joint Commission Accreditation, [http://www.jointcommission.org/accreditation/accreditation\\_main.aspx](http://www.jointcommission.org/accreditation/accreditation_main.aspx), Date accessed: Aug, 2012.
8. Greenfield D, Pawsey M, Braithwaite J. Accreditation: a global regulatory mechanism to promote quality and safety. In: Sollecito W, Johnson J, editors. *Continuous Quality Improvement in Health Care: Theory, Implementations, and Applications*. 4th ed. USA: Jones and Bartlett, 2013:pp 513-36.
9. Fairbrother G, Gleeson M. EQUiP accreditation: Feedback from a Sydney teaching hospital. *Australian Health Review* 2000;23(1).
10. Australian Council on Healthcare Standards. The ACHS National Report on Health Services Accreditation Performance 2009-2010. Sydney, 2011.
11. Commonwealth Government of Australia. A National Health and Hospitals Network for Australia's Future. Canberra: Department of Health and Ageing, 2010.
12. OECD. Health Data. Institution, 2012. <http://www.oecd.org/els/healthpoliciesanddata/oecdhealthdata2012.htm>. Date accessed; Nov 2012.

- 1  
2  
3 13. Kohn L, Corrigan J, Donaldson M. To Err is Human: Building a safer health system. Committee on  
4  
5 Quality of Health Care in America - Institute of Medicine, 2000.
- 6  
7 14. Runciman WB, Webb RK, Helps SC, Thomas EJ, Sexton EJ, Studder DM, et al. A comparison of  
8  
9 iatrogenic injury studies in Australia and the USA II: reviewer behaviour and quality of care.  
10  
11 *International Journal for Quality in Health Care* 2000;12(5):379-88.
- 12  
13 15. De Vries EN, Ramrattan MA, Smorenburg SM, Gouma DJ, Boermeester MA. The incidence and  
14  
15 nature of in-hospital adverse events: A systematic review. *Quality and Safety in Health Care*  
16  
17 2008;17(3):216-23.
- 18  
19 16. Hauck K, Zhao X, Jackson T. Adverse event rates as measures of hospital performance. *Health*  
20  
21 *Policy* 2012;104(2):146-54.
- 22  
23 17. Squires D. Using Comparative Effectiveness Research to Inform Policymaking. New York: The  
24  
25 Commonwealth Fund, 2012.
- 26  
27 18. National Health and Hospitals Reform Commission. Beyond the Blame Game: Accountability and  
28  
29 performance benchmarks for the next Australian Health Care Agreements. Canberra: NHHRC,  
30  
31 2008.
- 32  
33 19. Australian Government. Best Practice Regulation Guidance Note: Decision rules in regulatory  
34  
35 cost-benefit analysis. Canberra: OBPR, 2009
- 36  
37 20. Commonwealth of Australia. Handbook of Cost-Benefit Analysis. Canberra: Department of  
38  
39 Finance and Administration, 2006.
- 40  
41 21. HM Treasury. The Green Book: Appraisal and Evaluation in Central Government, London: TSO,  
42  
43 2003 (updated 2011)
- 44  
45 22. Drummond MF, Sculpher M, Torrance G, O'Brien B, Stoddart G. *Methods for the Economic*  
46  
47 *Evaluation of Health Care Programmes*. Third ed: Oxford Medical Publications, 2005.
- 48  
49 23. Gray A, Clarke P, Wolstenhome J, Wordsworth S. *Applied Methods of Cost-Effectiveness*  
50  
51 *Analysis in Health Care*: Oxford University Press, 2011.
- 52  
53 24. National Institute for Health and Clinical Excellence. Updated guide to the methods of technology  
54  
55 appraisal: Issued June 2008: NICE, 2008.
- 56  
57 25. Pharmaceutical Benefits Advisory Committee. Guidelines for the Pharmaceutical Industry on  
58  
59 Preparation of Submissions to the Pharmaceutical Benefits Advisory Committee: including major  
60  
60 submissions involving economic analyses. Canberra: Australian Government Department for

- 1  
2  
3 Health and Ageing, 1995.
- 4  
5 26. McIntosh E, Clarke B, Frew E, Louviere J. *Applied Methods of Cost-Benefit Analysis in Health*  
6  
7 *Care*: Oxford University Press, 2010.
- 8  
9 27. Shiell A, Hawe P, Gold L. Complex interventions or complex systems? Implications for health  
10  
11 economic evaluation. *BMJ* 2008;336(7656):1281-83.
- 12  
13 28. Braithwaite J, Westbrook J, Johnston B, Clark S, Brandon M, Banks M, et al. Strengthening  
14  
15 organizational performance through accreditation research - a framework for twelve interrelated  
16  
17 studies: the ACCREDIT project study protocol. *BMC Research Notes* 2011;4(1):390.
- 18  
19 29. Øvretveit J. Quality evaluation and indicator comparison in health care. *The International Journal*  
20  
21 *of Health Planning and Management* 2001;16(3):229-41.
- 22  
23 30. Flodgren G, Pomey M, Taber S, Eccles M. Effectiveness of external inspection of compliance with  
24  
25 standards in improving healthcare organisation behaviour, healthcare professional behaviour or  
26  
27 patient outcomes. *Cochrane database of systematic reviews (Online)* 2011(11).
- 28  
29 31. Appleyard G, John Ramsay and Associates Pty Ltd. Cost Analysis of Safety and Quality  
30  
31 Accreditation in the Australian Health System. Australian Commission for Safety and Quality in  
32  
33 Health Care, 2008.
- 34  
35 32. Imbens GW, Wooldridge JM. Recent Developments in the Econometrics of Program Evaluation.  
36  
37 *Journal of Economic Literature* 2009;47(1):5-86.
- 38  
39 33. Australian Institute of Health and Welfare. Australia's hospitals 2009–10: at a glance. Health  
40  
41 services series no.39. Cat. no. HSE 106. Canberra: AIHW, 2011.
- 42  
43 34. Productivity Commission. General Practice Administrative and Compliance Costs - Research  
44  
45 Report. Canberra: Productivity Commission, 2003.
- 46  
47 35. Foster BJ, Gipe B. A detailed analysis of the costs of a JCAHO survey. *Cost & quality quarterly*  
48  
49 *journal* : CQ 1997;3(1):19-24.
- 50  
51 36. Mihalik G, Scherer M, Schreter R. The High Price of Quality: A Cost Analysis of NCQA  
52  
53 Accreditation. *Journal of Health Care Finance* 2003;29(3):38.
- 54  
55 37. Rockwell DA, Pelletier LR, Donnelly W. The cost of accreditation: one hospital's experience.  
56  
57 *Hospital & Community Psychiatry: A Journal of the American Psychiatric Association*  
58  
59 1993;44(2):151-55.
- 60  
61 38. Zarkin GA, Dunlap LJ, Homs G. The costs of pursuing accreditation for methadone treatment

- 1  
2  
3 sites: Results from a national study. *Evaluation Review* 2006;30(2):119-38.  
4  
5 39. Australian Government. Business Cost Calculator. Department of Finance and Deregulation.  
6  
7 Canberra: OBPR, 2008.  
8  
9 40. Accreditation Canada. Canadian Health Accreditation Report - Required Organizational Practices:  
10  
11 Emerging Risks, Focused Improvements. Ottawa: Accreditation Canada, 2012.  
12  
13 41. Australian Commission on Safety and Quality in Health Care. National Safety and Quality Health  
14  
15 Service Standards and their use in a Model National Accreditation Scheme: Decision Regulatory  
16  
17 Impact Statement. Sydney: ACSQHC, 2010.  
18  
19 42. Chassin MR, Loeb JM, Schmaltz SP, Wachter RM. Accountability Measures — Using  
20  
21 Measurement to Promote Quality Improvement. *New England Journal of Medicine*  
22  
23 2010;363(7):683-88.  
24  
25 43. Mant J. Process versus outcome indicators in the assessment of quality of health care.  
26  
27 *International Journal for Quality in Health Care* 2001;13(6):475-80.  
28  
29 44. Brook R, McGlynn E, Shekelle P. Defining and measuring quality of care: a perspective from US  
30  
31 researchers. *International Journal for Quality in Health Care* 2000;12(4):281-95.  
32  
33 45. Øvretveit J, Gustafson D. Evaluation of quality improvement programmes. *Quality and Safety in*  
34  
35 *Health Care* 2002;11(3):270-75.  
36  
37 46. Doyle G, Grampp C. The Cost of Implementing Accreditation: What are the benefits? Final Report  
38  
39 of the Retrospective Study. Health Information and Quality Authority: Irish Health Services  
40  
41 Accreditation Board, 2008.  
42  
43 47. Fujiwara.D, Campbell. R. Valuation Techniques for Social Cost-Benefit Analysis: Stated  
44  
45 Preference, Revealed Preference and Subjective Well-Being Approaches. A Discussion of the  
46  
47 Current Issues. London: Department for Work and Pensions, HM Treasury, 2011.  
48  
49 48. Hinchcliff R, Greenfield D, Moldovan M, Pawsey M, Mumford V, Westbrook JI, et al. Evaluation of  
50  
51 current Australian health service accreditation processes (ACCREDIT-CAP): Protocol for a mixed-  
52  
53 method research project. *BMJ Open* 2012;2(4).  
54  
55 49. Greenfield D, Hinchcliff R, Moldovan M, Mumford V, Pawsey M, Irene Westbrook J, et al. A  
56  
57 multimethod research investigation of consumer involvement in Australian health service  
58  
59 accreditation programmes: the ACCREDIT-SCI study protocol. *BMJ Open* 2012;2(5).  
60  
60 50. Australian Research Council. Linkage Projects. Canberra: Commonwealth of Australia, 2012.

- 1  
2  
3 51. University of New South Wales. Operations Manual for the Human Research Ethics Committee  
4 (HREC), Sydney: UNSW,2010.
- 5  
6  
7 52. Bender DE, Ewbank D. The focus group as a tool for health research: issues in design and  
8 analysis. *Health transition review : the cultural, social, and behavioural determinants of health*  
9 1994;4(1):63-80.
- 10  
11  
12 53. The SROI Network. A Guide to Social Return on Investment. London: UK Cabinet Office, 2012.
- 13  
14 54. Bukonda N, Tavrow P, Abdallah H, Hoffner K, Tembo J. Implementing a national hospital  
15 accreditation program: The Zambian experience. *International Journal for Quality in Health Care*  
16 2002;14(SUPPL. 1):7-16.
- 17  
18  
19 55. National Health Performance Authority. National Health Reform: Performance and Accountability  
20 Framework. Canberra: NHPA, 2012.
- 21  
22  
23 56. Australian Institute for Health and Welfare. A Set of Performance Indicators across the health and  
24 aged care system. Canberra: AIHW, 2008
- 25  
26  
27 57. Australian Institute for Health and Welfare & Australian Commission on Safety and Quality in  
28 Health Care. Sentinel events in Australian public hospitals 2004-2005. Canberra: AIHW, 2007
- 29  
30  
31 58. Jackson TJ, Michel JL, Roberts RF, Jorm CM, Wakefield JG. A classification of hospital-acquired  
32 diagnoses for use with routine hospital data. *Medical Journal of Australia* 2009;191(10):544-48.
- 33  
34  
35 59. Jackson T, Nghiem HS, Rowell D, Jorm C, Wakefield J. Marginal costs of hospital-acquired  
36 conditions: information for priority-setting for patient safety programmes and research. *Journal of*  
37 *Health Services Research & Policy* 2011;16(3):141-46.
- 38  
39  
40 60. National Health and Medical Research Council. How to Compare the costs and benefits:  
41 evaluation of the economic evidence. Canberra: Commonwealth of Australia, 2001
- 42  
43  
44 61. National Health and Medical Research Council of Australia. National Statement on Ethical  
45 Conduct in Human Research. Canberra: NHMRC, 2007 (updated 2009).
- 46  
47  
48 62. University of New South Wales A. Research Code of Conduct: Version 1.0 Effective 27 April  
49 2009.
- 50  
51  
52  
53  
54  
55  
56  
57  
58  
59  
60



**Economic evaluation of Australian acute care accreditation (ACCREDIT-CBA [Acute]): study protocol for a mixed-method research project**

|                                 |                                                                                                                                                                                                                                                                                                                                                                                                                                                                                                                                                                                                                                                                                                                                                                                                                                                             |
|---------------------------------|-------------------------------------------------------------------------------------------------------------------------------------------------------------------------------------------------------------------------------------------------------------------------------------------------------------------------------------------------------------------------------------------------------------------------------------------------------------------------------------------------------------------------------------------------------------------------------------------------------------------------------------------------------------------------------------------------------------------------------------------------------------------------------------------------------------------------------------------------------------|
| Journal:                        | <i>BMJ Open</i>                                                                                                                                                                                                                                                                                                                                                                                                                                                                                                                                                                                                                                                                                                                                                                                                                                             |
| Manuscript ID:                  | bmjopen-2012-002381.R1                                                                                                                                                                                                                                                                                                                                                                                                                                                                                                                                                                                                                                                                                                                                                                                                                                      |
| Article Type:                   | Protocol                                                                                                                                                                                                                                                                                                                                                                                                                                                                                                                                                                                                                                                                                                                                                                                                                                                    |
| Date Submitted by the Author:   | 14-Jan-2013                                                                                                                                                                                                                                                                                                                                                                                                                                                                                                                                                                                                                                                                                                                                                                                                                                                 |
| Complete List of Authors:       | Mumford, Virginia; University of New South Wales, Centre for Clinical Governance Research, Australian Institute of Health Innovation<br>Greenfield, David; University of New South Wales, Centre for Clinical Governance Research, Australian Institute of Health Innovation<br>Hinchcliff, Reece; University of New South Wales, Centre for Clinical Governance Research, Australian Institute of Health Innovation<br>Moldovan, Max; University of New South Wales, Centre for Clinical Governance Research, Australian Institute of Health Innovation<br>Forde, Kevin; School of Public Health and Community Medicine, Faculty of Medicine, University of New South Wales<br>Westbrook, Johanna; University of New South Wales, ORTON Research Institute<br>Braithwaite, Jeffrey; Centre for Clinical Governance Research, University of New South Wales |
| <b>Primary Subject Heading</b>: | Health services research                                                                                                                                                                                                                                                                                                                                                                                                                                                                                                                                                                                                                                                                                                                                                                                                                                    |
| Secondary Subject Heading:      | Health economics                                                                                                                                                                                                                                                                                                                                                                                                                                                                                                                                                                                                                                                                                                                                                                                                                                            |
| Keywords:                       | Health economics < HEALTH SERVICES ADMINISTRATION & MANAGEMENT, Clinical governance < HEALTH SERVICES ADMINISTRATION & MANAGEMENT, Health & safety < HEALTH SERVICES ADMINISTRATION & MANAGEMENT, Quality in health care < HEALTH SERVICES ADMINISTRATION & MANAGEMENT                                                                                                                                                                                                                                                                                                                                                                                                                                                                                                                                                                                      |
|                                 |                                                                                                                                                                                                                                                                                                                                                                                                                                                                                                                                                                                                                                                                                                                                                                                                                                                             |

SCHOLARONE™  
Manuscripts

1  
2  
3 **Economic evaluation of Australian acute care accreditation (ACCREDIT-CBA [Acute]): study**  
4 **protocol for a mixed-method research project**  
5

6 **ABSTRACT**  
7

8  
9 **Introduction:** The Accreditation Collaborative for the Conduct of Research, Evaluation and  
10 Designated Investigations through Teamwork – Cost-Benefit Analysis (ACCREDIT-CBA [Acute])  
11 study is designed to determine and make explicit, the costs and benefits of Australian acute care  
12 accreditation, and to determine the effectiveness of acute care accreditation in improving patient  
13 safety and quality of care. The cost-benefit analysis framework will be provided in the form of an  
14 interactive model for industry partners, health regulators and policy makers, accreditation agencies  
15 and acute care service providers.  
16  
17  
18  
19  
20  
21

22  
23 **Methods and Design:** The study will use a mixed-method approach to identify, quantify and  
24 monetise the costs and benefits of accreditation. Surveys, expert panels, focus groups, interviews,  
25 and primary and secondary data analysis will be used in cross-sectional and case study designs.  
26  
27  
28  
29

30 **Ethics and Dissemination:** The University of New South Wales Human Research Ethics Committee  
31 has approved this project (approval number HREC 10274). The results of the study will be reported  
32 via peer-reviewed publications, conferences and seminar presentations, and will form part of a  
33 doctoral thesis.  
34  
35  
36  
37  
38  
39  
40  
41  
42  
43  
44  
45  
46  
47  
48  
49  
50  
51  
52  
53  
54  
55  
56  
57  
58  
59  
60



**ARTICLE SUMMARY****Article focus**

- This study uses economic evaluation techniques to assess the costs and benefits of acute care accreditation in Australian health services. The objective is to provide an interactive model of the costs and benefits from the perspective of a broad range of stakeholders. The model can also be used to assess the effectiveness of accreditation in improving patient safety and quality of care.

**Key messages**

- Despite widespread implementation, the costs and benefits of acute care accreditation have not been clearly defined, identified and quantified.
- Economic evaluation techniques such as costs-benefit analysis can help determine whether accreditation is an effective driver of patient safety and quality of care.
- This protocol provides a unique specifically designed framework, and a number of purpose built tools, to systematically assess the costs and benefits of acute care accreditation.

**Strengths and limitations of this study**

- The strength of this study lies in using economic evaluation techniques to establish the role of acute care accreditation as an effective audit tool; this has not been accomplished previously.
- One limitation in determining the impact of accreditation in Australia is the lack of a suitable control group given the widespread implementation of accreditation.

## INTRODUCTION

Despite its widespread implementation, the costs and benefits of acute health services accreditation have not been clearly defined, identified and quantified.<sup>1-5</sup> An economic framework is needed to systematically assess and compare these costs and benefits. This study protocol applies economic evaluation techniques using a purpose-designed framework to answer our research question as to whether acute care accreditation in Australia is effective in improving patient safety and quality of care.

### Accreditation of acute health services in Australia

The International Society for Quality in Health Care (ISQua), the peak body for health services accreditation, defines accreditation as “public recognition of the achievement of standards by an organisation demonstrated through independent assessment in relation to set standards”.<sup>6,6</sup> Accreditation has been widely implemented following the establishment of the Joint Commission on Accreditation of Hospitals (now, the Joint Commission) in the United States (US) in 1951.<sup>7,8</sup> In Australia, accreditation was first adopted for acute care services in 1974,<sup>9</sup> with the Australian Council on Healthcare Standards (ACHS) as the main accrediting agency. Over subsequent years, ACHS developed the Evaluation and Quality Improvement Program (EQulP). This accreditation programme comprises two external surveys within a four-year accreditation cycle.<sup>10</sup> Facilities are assessed by trained external surveyors using standards developed by ACHS in consultation with health care industry experts.<sup>10</sup> As part of wider health system reforms implemented by the Australian Commonwealth Government, recently approved legislation requires all hospitals and day procedure services in Australia to be assessed by an accreditation provider approved by the Australian Commission on Safety and Quality in Health Care (ACSQHC) using newly developed National Safety and Quality Health Service (NSQHS) standards.<sup>11</sup> Australian acute care accreditation is the focus of this study. We include acute and high risk inpatient activity in our definition of acute care facilities (ACFs) in this protocol.

### Economic evaluation of health interventions

Health costs are a significant proportion of gross domestic product, averaging 9.6% in 2010 for

1  
2  
3 Organisation for Economic and Co-operation Development countries.<sup>12</sup> This, combined with persistent  
4 evidence of harm during health service delivery,<sup>13-16</sup> has resulted in an increasing international focus  
5 on accountability and safety in health care.<sup>17-18</sup> Economic evaluation addresses these issues by using  
6 a systematic framework to identify and compare the costs and benefits of a policy or intervention to  
7 determine whether implementation is effective in achieving stated aims, and also to compare different  
8 policy proposals and interventions.<sup>19-21</sup> In cost-benefit analysis (CBA) the costs and benefits are each  
9 expressed in monetary terms. This contrasts with other techniques such as cost-effectiveness  
10 analysis (CEA) or cost-utility analysis (CUA) which are used in assessing health technologies. In CEA  
11 and CUA the common outcome denominator is not monetised, but expressed in terms of a common  
12 utility measure such as Quality Adjusted Life Years.<sup>22-25</sup> CBA is advocated where there is broader  
13 range of outcomes, and is usually a requirement for submitting a regulatory impact statement for  
14 Australian government approval.<sup>19</sup> CBA seems justified as the most appropriate model to use in an  
15 Australian health services context as the NSQHS standards cover both organisational and clinical  
16 outcomes, which are best measured using a common monetary denominator. Although CBA can be  
17 used as an allocative efficiency tool for comparing different projects, the requirement to make the  
18 costs and benefits explicit in the analysis framework can help clarify the goals, costs, and benefits,  
19 providing input into the design of future accreditation systems in healthcare.<sup>26</sup>

20  
21  
22  
23  
24  
25  
26  
27  
28  
29  
30  
31  
32  
33  
34  
35  
36  
37  
38  
39  
40  
41  
42  
43  
44  
45  
46  
47  
48  
49  
50  
51  
52  
53  
54  
55  
56  
57  
58  
59  
60

Modelling the costs and benefits of a complex intervention, such as accreditation, in a complex system, such as an ACF, is a significant undertaking.<sup>27</sup> Given the lack of precedent discussed above, we have developed a unique framework, and a number of purpose-built tools specifically designed for evaluating acute care accreditation. Our SIQNS framework is synthesized from several sources,<sup>20-21-28</sup> and comprises five discrete activities: 1) **Scope** and objectives; 2) **Identify costs and benefits**; 3) **Quantify costs and benefits**; 4) calculate **Net social benefits**; and 5) **Sensitivity analysis** (Figure 1).

**Figure 1: SIQNS framework**

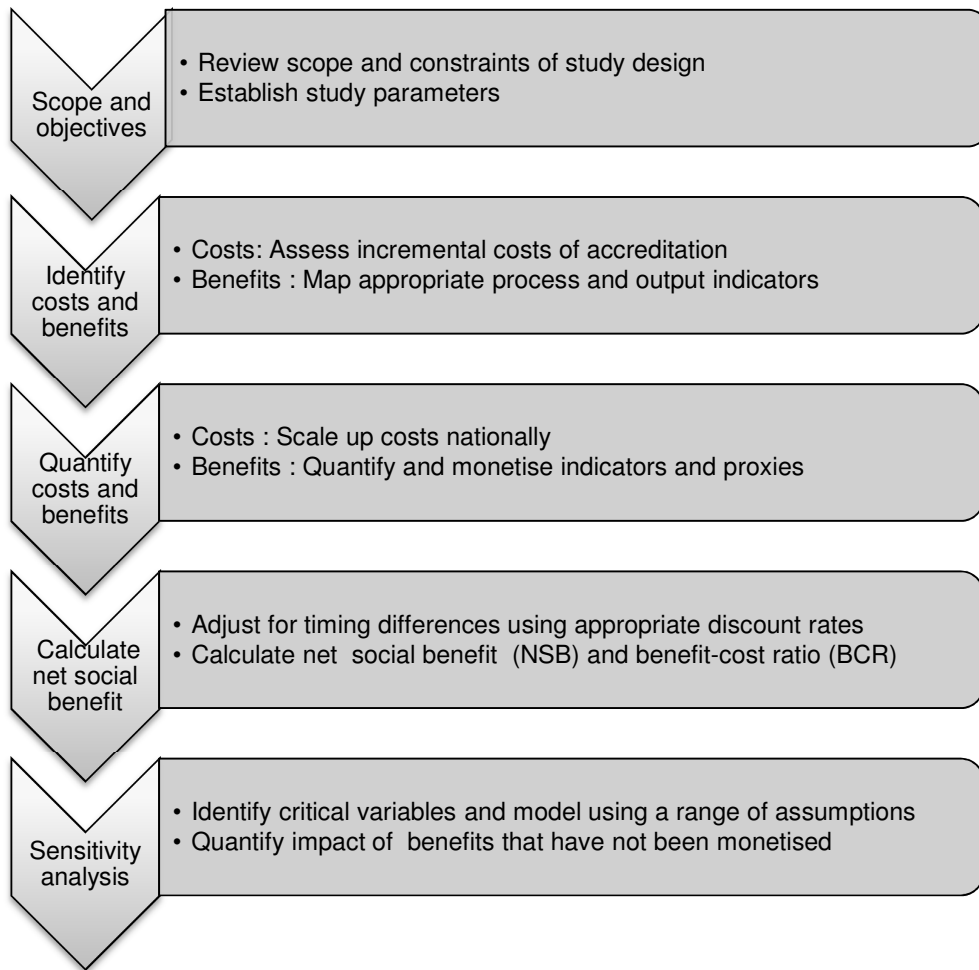

### Scope and objectives

The aim of the study is to create an interactive model that can be accessed by health service providers, accreditation bodies, quality and safety agencies, governments, and researchers to both test the assumptions in the model, and to determine the cost-benefit calculations of acute care accreditation at both a national and local service level.<sup>28</sup> The lack of research in this field, and complexity of both the intervention (accreditation) and system (acute health care), indicates that an important objective will be to make explicit the costs and benefits of accreditation.<sup>1 2 27 29 30</sup>

Establishment of the study parameters will be informed by a review of the research literature and analysis of the characteristics of accredited ACFs. These activities will also help determine the indicator selection process to identify and quantify the benefits of accreditation. A critical element is in

1  
2  
3 identifying the stakeholders involved in the acute care accreditation process. Although accreditation  
4 agencies and ACFs are the most obvious groups affected, a broader societal framework is required  
5 when assessing regulatory impact to ensure equity and impact are meaningfully accounted for in the  
6 analysis.<sup>20</sup>  
7  
8  
9

10  
11  
12 Our initial analysis has identified a key constraint, in that ACFs do not account for accreditation  
13 activities as a separate cost item.<sup>31</sup> Our approach, outlined below, is to accept that large scale data  
14 gathering on costs would not be possible within the scope of the study and will be a challenge over  
15 time. Instead, we will use a smaller study sample and have this validated by an expert panel.  
16  
17 Accreditation benefits, in terms of both clinical and organisational outcomes, are more likely to be  
18 assessed using secondary data, but are more difficult to identify partly due to a lack of clarity in terms  
19 of measurable endpoints. In addition, a full impact analysis of all benefits for all stakeholders will be  
20 outside the study scope. A further constraint is that an economic appraisal would ideally be conducted  
21 with a control group (either randomly assigned or with data collected for a before and after  
22 comparison) in order to compare different outcomes.<sup>32</sup> This is not possible in Australia where acute  
23 care accreditation is widely implemented (93% of public hospital beds in 2010, and 84% of private  
24 hospital beds in 2008-2009).<sup>33</sup> However, we can analyse data before and after introduction of new  
25 standards, review indicator activity against accreditation scores, and analyse changes over time.  
26  
27  
28  
29  
30  
31  
32  
33  
34  
35  
36  
37

### 38 **Identify costs and benefits**

39  
40 To identify the incremental costs of accreditation, we need to determine costs that are only incurred  
41 due to the accreditation process.<sup>34</sup> We will first review the stakeholders for potential costs and exclude  
42 transfer payments to avoid double counting. We will then assess costs for a small number of ACFs  
43 (n=10) using our purpose designed assessment tool based on questions posed in similar cost  
44 surveys,<sup>35-38</sup> and the Business Cost Calculator which has been designed to help Australian  
45 businesses compute business compliance costs.<sup>7 10 39 40</sup>  
46  
47  
48  
49  
50

51  
52  
53 International accreditation agencies, e.g., the Joint Commission, ACHS and Accreditation Canada,  
54 identify improvements in patient safety and quality of care as the main benefits of health services  
55 accreditation.<sup>7 10 40</sup> Within an Australian context, we reviewed the benefits outlined by ACSQHC in a  
56  
57  
58  
59  
60

1  
2  
3 recent regulatory impact statement on the new NSQHS standards.<sup>41</sup> In addition the Australian  
4 National Health Performance Authority's (NHPA's) performance and accountability framework has  
5 defined the indicators used to assess effectiveness of care in ACFs. We will map our stakeholder  
6 analysis with the ACSQHC benefits and the NHPA adverse and sentinel event measures to identify  
7 quality and safety indicators.  
8  
9

10  
11  
12  
13  
14 In our choice of indicators we need to distinguish whether a lack of change in the indicator is due to a  
15 lack of compliance with the accreditation standard, or whether compliance with the standard results in  
16 change in an indicator. We have adapted the approach used in measuring quality outcomes in US  
17 hospitals.<sup>42</sup> This recommends that indicators must meet four key accountability criteria: research –  
18 robust evidence; accuracy – whether the process has been carried out satisfactorily; proximity – a  
19 clear and direct link between accreditation and the indicator; and, no adverse effects – no unintended  
20 or unwanted actions. As accreditation is usually just one facet of a quality and safety framework, we  
21 have added a further criterion – specificity – to determine how easy it is to isolate the effects of  
22 accreditation from other safety and quality measures. This is important when determining the  
23 effectiveness of accreditation versus other safety and quality initiatives.<sup>43</sup> We specify the type of  
24 indicator, as process indicators are often a preferred measure of quality over outcome indicators. This  
25 is due to a more direct link between the indicator and the process being measured (the issue of  
26 proximity in Chassin's accountability criteria)<sup>42</sup> but this can also lead to estimation problems as only a  
27 narrow range of factors are considered. Outcome indicators have the advantage in that the data are  
28 often collected routinely, but may need to be adjusted for other factors such as patient acuity and  
29 complexity.<sup>43-45</sup> We will need to consider whether the chosen indicators need to be weighted to reflect  
30 both suitability (in terms of adherence to the accountability criteria), and applicability (quality of data  
31 collection and adjustment for patient mix). We will ask an expert panel to review and validate our  
32 indicator selections prior to quantifying the indicators for further analysis.  
33  
34  
35  
36  
37  
38  
39  
40  
41  
42  
43  
44  
45  
46  
47  
48  
49

### 50 51 **Quantify costs and benefits**

52  
53 Once the costs have been identified for each ACF in our sample, we will need to ensure the results  
54 can be scaled up and assessed on a national basis. Although costs for initial accreditation can be  
55 higher than for ongoing accreditation,<sup>38 46</sup> we assume ongoing accreditation costs for our sample, but  
56  
57  
58  
59  
60

1  
2  
3 include questions on estimating the cost of implementing the new national standards in the survey.  
4  
5 As the CBA model uses monetary values as the common denominator, we will need to monetise the  
6  
7 benefits identified. The techniques used will depend on the availability of pricing and market data. For  
8  
9 example, clinical outcome indicators (such as hospital acquired infection rates, or complications  
10  
11 resulting from inpatient falls) can be matched to activity-based costing codes. This data can be used  
12  
13 to determine the potential cost savings from a reduction in infection or fall rates. Where we identify an  
14  
15 indicator but do not see a change in measurement, we will include this in our sensitivity analysis, for  
16  
17 example, the costs associated with reducing hospital acquired infections by a stated amount. Where  
18  
19 indicators can be identified and quantified but lack pricing or market data, we will monetise the effects  
20  
21 using techniques such as revealed and stated preference methods, where possible.<sup>21 26 47</sup>  
22

### 23 **Calculate net social benefit**

24  
25 Given the costs and benefits are likely to occur at different times, we will need to adjust the timing  
26  
27 differentials using an appropriate discount rate. For CBA both the net social benefit (NSB) and the  
28  
29 benefits-cost ratio (BCR) are calculated. The NSB uses a net present value method to derive an  
30  
31 absolute measure of whether the discounted (net) benefits are greater than the discounted (net) costs  
32  
33 when assessing proposals in a regulatory impact statement.<sup>19 22</sup> The BCR is derived by dividing the  
34  
35 net benefits by the net costs to determine an effective return on the costs and is used where the  
36  
37 absolute size of the investment is a determining factor, for example in a resource constrained  
38  
39 environment. However, the BCR is subject to more variation depending on how the outcomes are  
40  
41 treated.<sup>19 20 22</sup>  
42

43  
44 With questions on the table about whether accreditation is more of an audit tool or quality  
45  
46 improvement tool,<sup>1 8</sup> CBA can address both these issues by not only comparing accreditation with  
47  
48 other safety and quality programmes, but also with other methods of regulatory compliance. Although  
49  
50 there is not a good counterfactual to accreditation due to widespread implementation,<sup>33</sup> we can  
51  
52 estimate the relative effectiveness of accreditation versus alternative forms of audit. Examples include  
53  
54 the additional requirements that a private ACF would need to meet to qualify for private health  
55  
56 funding, or additional auditing that would be required for public ACFs in the absence of accreditation.  
57  
58  
59  
60

### Sensitivity analysis

A sensitivity analysis is an essential tool to describe the impact of changes in assumptions and variables on our SIQNS framework,<sup>20</sup> especially given the constraints discussed. We will review the assumptions in the model and run the NSB and BCR calculations over a range of values. For some costs and benefits, including qualitative outcomes, monetisation will be beyond the scope of this study and these items will not be included in the NSB or BCR calculations. Nevertheless, these costs and benefits can still be included in the final model and used to compare other programmes with similar NSB or BCR outcomes but where the non-monetised items may be a deciding factor.

### ACCREDIT project overview

The ACCREDIT CBA [Acute] study is the sixth of 12 studies under the ACCREDIT (Accreditation Collaborative for the Conduct of Research, Evaluation and Designated Investigations through Teamwork) research collaboration,<sup>28 48 49</sup> funded by the Australian Research Council through its industry Linkage Program.<sup>50</sup> The ACCREDIT collaboration involves researchers in the Centre for Clinical Governance Research and Centre for Health Systems and Safety Research in the Australian Institute of Health Innovation (AIHI) at the University of New South Wales (UNSW), Australia. The ACCREDIT research team benefits from a high-profile international advisory group containing leading researchers in health safety and quality from the United Kingdom, Spain and Sweden. The collaboration includes two leading health safety and quality bodies (ACSQHC and the Clinical Excellence Commission [CEC]) plus three of the major Australian health services accreditation agencies: ACHS, Australian General Practice Accreditation Limited (AGPAL), and the Aged Care and Standards Accreditation Agency (ACSAA).

### METHODS AND ANALYSIS

The methods to obtain and analyse data needed to build the CBA model are discussed below using each of the five SIQNS activities. For each survey tool, focus group, and expert panel described in the following sections, the ACCREDIT research team will send an electronic invitation to potential participants containing the study information and consent forms approved by the UNSW Human Research Ethics Committee (HREC).<sup>51</sup> Those individuals wishing to participate will be asked to contact the UNSW research team and will be invited to either attend the relevant research activity. at

9



UNSW, or be interviewed via telephone. The research activities will last approximately one hour, and will be digitally recorded and professionally transcribed.

### **SIGNS activity 1: scope and objectives**

The first activity is to review the scope and constraints of the study design, and to establish the study parameters. This will be completed through three tasks: literature reviews; analysis of accredited ACFs; and stakeholder identification.

A literature review covering two general issues will be conducted. First, an investigation of the cost and benefits of accreditation, in health and related fields, and second, the compliance costs and methodologies used in non-health industries.

Analysis of accredited ACFs will be conducted using data from the ACHS national accreditation database, using accreditation survey data from 2003 to 2011. The purpose is to assess the characteristics of accredited ACFs: bed size; ownership and funding structure; geographic location (by state or territory); type of survey; and whether these are linked to accreditation outcomes. During 2007 ACHS made changes to the mandatory criteria assessed in the surveys with the changeover from EQulP3 to EQulP4. Therefore, econometric analysis of the main study variables will be over the full period (2003-2011), accompanied by analysis of individual standards as predictors of accreditation outcomes in the different EQulP programmes. This part of the study will provide guidance for reviewing the structure of the ACFs targeted in the costs study.

To evaluate the stakeholder base, the ACCREDIT research team will send an electronic invitation to senior health services researchers at AIHI, UNSW, to participate in a focus group.<sup>52</sup> Those willing to participate will be asked to contact the ACCREDIT team. The focus group will take place at UNSW using the general demographic and content questions from the Stakeholder Analysis Tool (Table 1).

**Table 1: Stakeholder Analysis Tool**

General demographic questions

- What is your age?

- What is your gender?
- What are your highest qualifications?
- What is your research discipline?
- How many years have you worked in health services research?
- How many years have you worked as a healthcare professional?
- How many first author peer- reviewed publications do you have?
- How many second or subsequent author publications do you have?

Content questions

1. Who are the key stakeholders in acute health care in Australia?
2. Please classify these as either:
  - a) Key stakeholders in acute care services who either contribute to, or influence, the costs and benefits of accreditation; or
  - b) Key stakeholders in acute care services who do not contribute directly to accreditation costs or benefits
3. Please identify the costs and benefits for each stakeholder identified in 2 a)

In keeping with the tenets of an inclusive societal framework,<sup>53</sup> stakeholders from group 2a) will be included in the list of identified stakeholders. Those in group 2b) will be closely reviewed for inclusion based on their knowledge and perspective. The group of identified stakeholders will be used throughout the study and referenced when considering the individual costs and benefits to ensure the broader social framework is addressed.

### **SIQNS activity 2: identify costs and benefits**

The aim of this activity is to estimate the incremental costs and the benefits of accreditation using a variety of purpose-built tools to both assess and validate our results. One of the main costs identified in previous research has been the preparation for external surveys in the accreditation cycle.<sup>9 35-38 54</sup> To recruit subjects, the UNSW research team will send a study invitation to the accreditation partners to forward on to the ACFs they accredit. The ACFs agreeing to participate will be characterised according to: facility specialisation (for example, teaching hospital); location (metropolitan or rural); and size (large, medium or small). One from each category (n=10) will be randomly selected and approached by the UNSW research team. Semi-structured interviews will be conducted with Finance Managers, Quality Managers, and General Managers as directed by the ACF, using the questions set out in the Incremental Costs Audit Tool (Table 2).

**Table 2: Incremental Costs Audit Tool**

1. Demographic details:
  - a. Bed size of facility
  - b. Location (State or Territory, and whether rural or metropolitan)
  - c. Funding structure (public or private)
  - d. Specialisation of the facility (e.g. teaching hospital, mental health, correctional facility or other)
  - e. Job description of respondent
2. Is this your first accreditation cycle?
3. Please provide details, where possible by year incurred, of activity based costing for the following activities in relation to the accreditation cycle:
  - a. Notification: implementing recommendations from the survey
  - b. Education: staff meetings, working groups and education sessions for new staff, and to accommodate changes in standards
  - c. Record-keeping: developing and maintaining policies and documents
  - d. Enforcement: staff allocated to assist surveyors, and in pre- and post-survey briefings
  - e. Publication and documentation: survey and self-assessment preparation
  - f. Procedural: collecting consumer feedback relating to accreditation standards
  - g. Other: details of staff involved in surveying other facilities
  - h. Purchases: survey fees and consultancy fees relating to accreditation
4. What do you estimate will be the difference in costs (if any) for complying with the new National Safety and Quality Health Service Standards?

Given the relatively small size of the survey sample, we will validate the results using an expert panel consisting of: accreditation surveyors; leading accreditation researchers; accreditation agencies; health quality consultants; and government health quality improvement agencies. We will also invite staff and surveyors from ACFs who agreed to participate, but not selected for interviews, to take part in the panel. A de-identified costs summary will be given to participants in advance, and the panel will be asked to discuss the questions set out in the Incremental Costs Validation Tool (Table 3).

**Table 3: Incremental Costs Validation Tool**

1. Do you think the results from the audit tool are representative of the current accreditation process?
2. If these costs are not representative, what is your estimate of the costs?

- 1  
2  
3 3. Are there other incremental costs that have not been included?  
4  
5 4. What would be your estimate of costs identified in question 3?  
6  
7

8 The outcomes of both the incremental costs audit and validation tools will be assessed against results  
9 of the stakeholder analysis. Total costs will be estimated at a national level.  
10

11  
12  
13 To determine the specific benefits of accreditation we will use our Indicator Assessment Tool (Table  
14 4) to identify the main topics in the new NSQHS standards and identify the relevant standard in the  
15 ACHS EQulP5 survey. We will then review a range of process and outcome indicators including  
16 adverse events highlighted in the NHPA framework,<sup>55</sup> as well as the outcome indicators and sentinel  
17 events collected by the Australian Institute of Health and Welfare.<sup>56 57</sup>  
18  
19  
20  
21  
22  
23  
24

25 **Table 4: Indicator Assessment Tool**

| Intervention Topic             |                                                                                                                   |
|--------------------------------|-------------------------------------------------------------------------------------------------------------------|
| <b>Accreditation Standards</b> | List relevant standards relating to the intervention topic                                                        |
| NSQHS Standards                | Identify the relevant NSQHS standard                                                                              |
| ACHS EQulP5                    | Whether the intervention is a mandatory criteria in EQulP5                                                        |
| <b>Indicator</b>               | Description of indicator                                                                                          |
| <b>Indicator type</b>          | Whether the indicator is process or outcome based                                                                 |
| <b>Research</b>                | What is the evidence base that compliance with the standard affects the indicator?                                |
| <b>Accuracy</b>                | How accurate is the indicator in terms of measuring compliance with the accreditation standard?                   |
| <b>Proximity</b>               | How close is the link between the standard and the indicator, is there a causal chain?                            |
| <b>No adverse effects</b>      | What is the risk of avoiding adverse effects?                                                                     |
| <b>Specificity</b>             | Is it possible to isolate the effects of accreditation on the indicator from other safety and quality programmes? |
| <b>Associate programmes</b>    | Related programmes initiated by state or federal governments, or healthcare agencies                              |

26  
27  
28  
29  
30  
31  
32  
33  
34  
35  
36  
37  
38  
39  
40  
41  
42  
43  
44  
45  
46  
47  
48  
49  
50  
51  
52  
53  
54

55 The results of our indicator selection process will be validated using the established expert panel. A  
56  
57

summary of the potential indicators and scores from the Indicator Assessment Tool will be given to participants in advance of the panel. The interviews with the panel will use the semi-structured questions in the Indicator Validation Tool (Table 5).

**Table 5: Indicator Validation Tool**

1. Do you think the indicators selected using the Indicator Assessment Tool are representative of the benefits of accreditation?
2. If these are not representative, what indicators would you add, and why?
3. For the indicators you have identified, would you recommend attaching a weighting to the monetized values, and if so what weighting would you recommend?

The results of the panel will be used to formulate a list of benefit indicators. These will then be mapped to appropriate databases to look for evidence of improvement over accreditation cycles or following introduction of a relevant standard. Indicators with low scores from the Indicator Assessment Tool, especially for the proximity and specificity criteria, will be evaluated for inclusion or rejection. Since this is a high level description of the protocol we have not detailed the exact methods for statistical analysis as these will depend on the indicators selected. The main difficulty is in determining a causal effect where there is no control group given the widespread implementation of accreditation, and we will need to select the appropriate economic evaluation techniques depending on the results.

### **SIQNS activity 3: quantify costs and benefits**

Costs will be scaled up nationally according to facility-type both by an actual dollar amount and as a percentage of total costs. Identified benefits will be quantified and monetised using a number of techniques depending on the type of indicators validated by our expert panel. For example, clinical outcome indicators can be matched to the ACSQHC's Costs of Hospital Acquired Diagnoses activity based costing codes.<sup>58 59</sup> Process measures are more difficult to quantify but techniques for valuing non-market costs such as revealed and stated preference will be used to monetise the benefits where possible.<sup>21 22 47</sup>

#### SIQNS activity 4: calculate net social benefit

Our interactive CBA model will be populated with the costs and benefits identified and quantified in SIQNS activities 2 and 3. Costs will be added to the model and allocated by year incurred during the accreditation cycle. The benefits will be allocated depending on the type of indicator used. For example, for clinical indicators such as hospital acquired infection rates, the cost savings from a reduction in infection rates per year nationally can be monetised and modelled. Where the timing is not clear, we will assign equal weights over the expected time horizon and discount accordingly. Australian Government approved discount rates will be applied to the model in order to discount the cost and benefit cash flows back to a baseline year.<sup>19 60</sup> Both the NSB and BCR (Equations 1 and 2) will be calculated for the costs and benefits that have been monetised. Non-monetised costs and benefits will be included for comparative analysis if they can be quantified.

$$\text{Equation 1: NSB} = \sum_{t=1}^n \frac{(B_t - C_t)}{(1 + r)^t}$$

$$\text{Equation 2: BCR} = \frac{\sum_{t=1}^n \frac{B_t}{(1 + r)^t}}{\sum_{t=1}^n \frac{C_t}{(1 + r)^t}}$$

**Legend for Equation 1 and 2:**  $B_t$  is the sum of benefits in year  $t$ ;  $C_t$  is sum of costs in year  $t$ ;  $n$  is the lifetime of the accreditation cycle or expected time horizon, in years; and  $r$  is the discount rate used.

#### SIQNS activity 5: sensitivity analysis

In order to determine the sensitivity of inputs into the model, NSB and BCR will be recalculated for a range of values (plus and minus 1%, 5% and 10% of the total values) for each individual cost and benefit that is more than 10% of the total. In addition, the model will be run with discount rates at plus and minus two and five percentage points from the base discount rates used in order to test the duration sensitivity of the model.

#### ETHICS AND DISSEMINATION

The UNSW HREC has approved the ACCREDIT-CBA (Acute) study proposal (approval number HREC 10274). The study will be conducted in accordance with the UNSW Research Code of Conduct and Australian National Health and Medical Research Council (NHMRC) guidelines.<sup>61 62</sup> As such, all

1  
2  
3 project data will be de-identified prior to publication and stored securely for a minimum of seven  
4 years. Contact details of the research team will be given to participants in the study so that any  
5 complaints or concerns can be addressed. The results of the study will be submitted for publication in  
6 selected journals and presented at national and international conferences and seminars. The findings  
7 will also form part of a doctoral thesis.  
8  
9  
10  
11

## 12 13 14 **CONCLUSION**

15 Although accreditation of acute health services has been widely adopted in Australia, little is currently  
16 known about the costs and benefits of the process, and whether accreditation is a cost-effective tool  
17 in improving patient safety and quality of care. This study aims to create a framework to answer these  
18 questions and to make the costs and benefits of accreditation explicit. This will, in turn, inform debate  
19 on the important issue of how best to monitor and improve patient safety and quality of care in acute  
20 health services.  
21  
22  
23  
24  
25  
26  
27

28  
29 **ACKNOWLEDGEMENTS:** We acknowledge the staff of the industry partners (ACHS, AGPAL,  
30 ACSAA) and the quality improvement agencies (ACSQHC and CEC) who are providing support for  
31 the project.  
32  
33  
34  
35

36 **COMPETING INTERESTS:** The authors have no competing interests to declare.  
37  
38  
39

40 **FUNDING AND ETHICS:** This research is supported under the Australian Research Council's  
41 Linkage Projects scheme (project LP100200586), and NHMRC Program grant number 568612.  
42 Although the ARC and NHMRC have contributed to funding the research, the final responsibility for all  
43 research activities, including the decision to publish the results of the studies, resides with UNSW.  
44 Ethics approval was granted by the UNSW Human Research Ethics Committee (approval number  
45 HREC 10274).  
46  
47  
48  
49  
50  
51

52  
53 **AUTHORS' CONTRIBUTIONS:** All authors contributed to the writing of the protocol and will assist in  
54 the conduct of the project.  
55  
56  
57  
58  
59  
60

## REFERENCES

1. Shaw CD. Evaluating accreditation. *International Journal for Quality in Health Care* 2003;15(6):455-56.
2. Braithwaite J, Greenfield D, Westbrook J, Pawsey M, Westbrook M, Gibberd R, et al. Health service accreditation as a predictor of clinical and organisational performance: a blinded, random, stratified study. *Quality & Safety in Health Care* 2010;19(1):14-21.
3. Greenfield D, Pawsey M, J. B. The role and impact of accreditation on the healthcare revolution [O papel e o impacto da acreditação na revolução da atenção à saúde]. *Acreditação*, 2012;1(2):64-67.
4. Greenfield D, Braithwaite J. Health sector accreditation research: a systematic review. *International Journal for Quality in Health Care* 2008;20(3):172-83.
5. Hinchcliff R, Greenfield D, Moldovan M, Westbrook JI, Pawsey M, Mumford V, et al. Narrative synthesis of health service accreditation literature. *Quality and Safety in Health Care*. Published Online First, 4 October 2012 : doi: 10.1136/bmjqs-2012-000852.
6. ISQuA. The International Society for Quality in Health Care Ltd - Articles of Association, 2011.
7. The Joint Commission. Benefits of Joint Commission Accreditation, [http://www.jointcommission.org/accreditation/accreditation\\_main.aspx](http://www.jointcommission.org/accreditation/accreditation_main.aspx), Date accessed: Aug, 2012.
8. Greenfield D, Pawsey M, Braithwaite J. Accreditation: a global regulatory mechanism to promote quality and safety. In: Sollecito W, Johnson J, editors. *Continuous Quality Improvement in Health Care: Theory, Implementations, and Applications*. 4th ed. USA: Jones and Bartlett, 2013:pp 513-36.
9. Fairbrother G, Gleeson M. EQuIP accreditation: Feedback from a Sydney teaching hospital. *Australian Health Review* 2000;23(1).
10. Australian Council on Healthcare Standards. The ACHS National Report on Health Services Accreditation Performance 2009-2010. Sydney, 2011.
11. Commonwealth Government of Australia. A National Health and Hospitals Network for Australia's Future. Canberra: Department of Health and Ageing, 2010.
12. OECD. Health Data. Institution, 2012. <http://www.oecd.org/els/healthpoliciesanddata/oecdhealthdata2012.htm>. Date accessed; Nov 2012.



- 1  
2  
3 13. Kohn L, Corrigan J, Donaldson M. To Err is Human: Building a safer health system. Committee on  
4  
5 Quality of Health Care in America - Institute of Medicine, 2000.
- 6  
7 14. Runciman WB, Webb RK, Helps SC, Thomas EJ, Sexton EJ, Studder DM, et al. A comparison of  
8  
9 iatrogenic injury studies in Australia and the USA II: reviewer behaviour and quality of care.  
10  
11 *International Journal for Quality in Health Care* 2000;12(5):379-88.
- 12  
13 15. De Vries EN, Ramrattan MA, Smorenburg SM, Gouma DJ, Boermeester MA. The incidence and  
14  
15 nature of in-hospital adverse events: A systematic review. *Quality and Safety in Health Care*  
16  
17 2008;17(3):216-23.
- 18  
19 16. Hauck K, Zhao X, Jackson T. Adverse event rates as measures of hospital performance. *Health*  
20  
21 *Policy* 2012;104(2):146-54.
- 22  
23 17. Squires D. Using Comparative Effectiveness Research to Inform Policymaking. New York: The  
24  
25 Commonwealth Fund, 2012.
- 26  
27 18. National Health and Hospitals Reform Commission. Beyond the Blame Game: Accountability and  
28  
29 performance benchmarks for the next Australian Health Care Agreements. Canberra: NHHRC,  
30  
31 2008.
- 32  
33 19. Australian Government. Best Practice Regulation Guidance Note: Decision rules in regulatory  
34  
35 cost-benefit analysis. Canberra: OBPR, 2009
- 36  
37 20. Commonwealth of Australia. Handbook of Cost-Benefit Analysis. Canberra: Department of  
38  
39 Finance and Administration, 2006.
- 40  
41 21. HM Treasury. The Green Book: Appraisal and Evaluation in Central Government, London: TSO,  
42  
43 2003 (updated 2011)
- 44  
45 22. Drummond MF, Sculpher M, Torrance G, O'Brien B, Stoddart G. *Methods for the Economic*  
46  
47 *Evaluation of Health Care Programmes*. Third ed: Oxford Medical Publications, 2005.
- 48  
49 23. Gray A, Clarke P, Wolstenhome J, Wordsworth S. *Applied Methods of Cost-Effectiveness*  
50  
51 *Analysis in Health Care*: Oxford University Press, 2011.
- 52  
53 24. National Institute for Health and Clinical Excellence. Updated guide to the methods of technology  
54  
55 appraisal: Issued June 2008: NICE, 2008.
- 56  
57 25. Pharmaceutical Benefits Advisory Committee. Guidelines for the Pharmaceutical Industry on  
58  
59 Preparation of Submissions to the Pharmaceutical Benefits Advisory Committee: including major  
60  
60 submissions involving economic analyses. Canberra: Australian Government Department for

- 1  
2  
3 Health and Ageing, 1995.
- 4  
5 26. McIntosh E, Clarke B, Frew E, Louviere J. *Applied Methods of Cost-Benefit Analysis in Health*  
6  
7 *Care*: Oxford University Press, 2010.
- 8  
9 27. Shiell A, Hawe P, Gold L. Complex interventions or complex systems? Implications for health  
10  
11 economic evaluation. *BMJ* 2008;336(7656):1281-83.
- 12  
13 28. Braithwaite J, Westbrook J, Johnston B, Clark S, Brandon M, Banks M, et al. Strengthening  
14  
15 organizational performance through accreditation research - a framework for twelve interrelated  
16  
17 studies: the ACCREDIT project study protocol. *BMC Research Notes* 2011;4(1):390.
- 18  
19 29. Øvretveit J. Quality evaluation and indicator comparison in health care. *The International Journal*  
20  
21 *of Health Planning and Management* 2001;16(3):229-41.
- 22  
23 30. Flodgren G, Pomey M, Taber S, Eccles M. Effectiveness of external inspection of compliance with  
24  
25 standards in improving healthcare organisation behaviour, healthcare professional behaviour or  
26  
27 patient outcomes. *Cochrane database of systematic reviews (Online)* 2011(11).
- 28  
29 31. Appleyard G, John Ramsay and Associates Pty Ltd. Cost Analysis of Safety and Quality  
30  
31 Accreditation in the Australian Health System. Australian Commission for Safety and Quality in  
32  
33 Health Care, 2008.
- 34  
35 32. Imbens GW, Wooldridge JM. Recent Developments in the Econometrics of Program Evaluation.  
36  
37 *Journal of Economic Literature* 2009;47(1):5-86.
- 38  
39 33. Australian Institute of Health and Welfare. Australia's hospitals 2009–10: at a glance. Health  
40  
41 services series no.39. Cat. no. HSE 106. Canberra: AIHW, 2011.
- 42  
43 34. Productivity Commission. General Practice Administrative and Compliance Costs - Research  
44  
45 Report. Canberra: Productivity Commission, 2003.
- 46  
47 35. Foster BJ, Gipe B. A detailed analysis of the costs of a JCAHO survey. *Cost & quality quarterly*  
48  
49 *journal : CQ* 1997;3(1):19-24.
- 50  
51 36. Mihalik G, Scherer M, Schreter R. The High Price of Quality: A Cost Analysis of NCQA  
52  
53 Accreditation. *Journal of Health Care Finance* 2003;29(3):38.
- 54  
55 37. Rockwell DA, Pelletier LR, Donnelly W. The cost of accreditation: one hospital's experience.  
56  
57 *Hospital & Community Psychiatry: A Journal of the American Psychiatric Association*  
58  
59 1993;44(2):151-55.
- 60  
61 38. Zarkin GA, Dunlap LJ, Homs G. The costs of pursuing accreditation for methadone treatment

- 1  
2  
3 sites: Results from a national study. *Evaluation Review* 2006;30(2):119-38.
- 4  
5 39. Australian Government. Business Cost Calculator. Department of Finance and Deregulation.  
6  
7 Canberra: OBPR, 2008.
- 8  
9 40. Accreditation Canada. Canadian Health Accreditation Report - Required Organizational Practices:  
10  
11 Emerging Risks, Focused Improvements. Ottawa: Accreditation Canada, 2012.
- 12  
13 41. Australian Commission on Safety and Quality in Health Care. National Safety and Quality Health  
14  
15 Service Standards and their use in a Model National Accreditation Scheme: Decision Regulatory  
16  
17 Impact Statement. Sydney: ACSQHC, 2010.
- 18  
19 42. Chassin MR, Loeb JM, Schmaltz SP, Wachter RM. Accountability Measures — Using  
20  
21 Measurement to Promote Quality Improvement. *New England Journal of Medicine*  
22  
23 2010;363(7):683-88.
- 24  
25 43. Mant J. Process versus outcome indicators in the assessment of quality of health care.  
26  
27 *International Journal for Quality in Health Care* 2001;13(6):475-80.
- 28  
29 44. Brook R, McGlynn E, Shekelle P. Defining and measuring quality of care: a perspective from US  
30  
31 researchers. *International Journal for Quality in Health Care* 2000;12(4):281-95.
- 32  
33 45. Øvretveit J, Gustafson D. Evaluation of quality improvement programmes. *Quality and Safety in*  
34  
35 *Health Care* 2002;11(3):270-75.
- 36  
37 46. Doyle G, Grampp C. The Cost of Implementing Accreditation: What are the benefits? Final Report  
38  
39 of the Retrospective Study. Health Information and Quality Authority: Irish Health Services  
40  
41 Accreditation Board, 2008.
- 42  
43 47. Fujiwara.D, Campbell. R. Valuation Techniques for Social Cost-Benefit Analysis: Stated  
44  
45 Preference, Revealed Preference and Subjective Well-Being Approaches. A Discussion of the  
46  
47 Current Issues. London: Department for Work and Pensions, HM Treasury, 2011.
- 48  
49 48. Hinchcliff R, Greenfield D, Moldovan M, Pawsey M, Mumford V, Westbrook JI, et al. Evaluation of  
50  
51 current Australian health service accreditation processes (ACCREDIT-CAP): Protocol for a mixed-  
52  
53 method research project. *BMJ Open* 2012;2(4).
- 54  
55 49. Greenfield D, Hinchcliff R, Moldovan M, Mumford V, Pawsey M, Irene Westbrook J, et al. A  
56  
57 multimethod research investigation of consumer involvement in Australian health service  
58  
59 accreditation programmes: the ACCREDIT-SCI study protocol. *BMJ Open* 2012;2(5).
- 60  
60 50. Australian Research Council. Linkage Projects. Canberra: Commonwealth of Australia, 2012.

- 1  
2  
3 51. University of New South Wales. Operations Manual for the Human Research Ethics Committee  
4 (HREC), Sydney: UNSW,2010.
- 5  
6  
7 52. Bender DE, Ewbank D. The focus group as a tool for health research: issues in design and  
8 analysis. *Health transition review : the cultural, social, and behavioural determinants of health*  
9 1994;4(1):63-80.
- 10  
11  
12 53. The SROI Network. A Guide to Social Return on Investment. London: UK Cabinet Office, 2012.
- 13  
14 54. Bukonda N, Tavrow P, Abdallah H, Hoffner K, Tembo J. Implementing a national hospital  
15 accreditation program: The Zambian experience. *International Journal for Quality in Health Care*  
16 2002;14(SUPPL. 1):7-16.
- 17  
18  
19 55. National Health Performance Authority. National Health Reform: Performance and Accountability  
20 Framework. Canberra: NHPA, 2012.
- 21  
22  
23 56. Australian Institute for Health and Welfare. A Set of Performance Indicators across the health and  
24 aged care system. Canberra: AIHW, 2008
- 25  
26  
27 57. Australian Institute for Health and Welfare & Australian Commission on Safety and Quality in  
28 Health Care. Sentinel events in Australian public hospitals 2004-2005. Canberra: AIHW, 2007
- 29  
30  
31 58. Jackson TJ, Michel JL, Roberts RF, Jorm CM, Wakefield JG. A classification of hospital-acquired  
32 diagnoses for use with routine hospital data. *Medical Journal of Australia* 2009;191(10):544-48.
- 33  
34  
35 59. Jackson T, Nghiem HS, Rowell D, Jorm C, Wakefield J. Marginal costs of hospital-acquired  
36 conditions: information for priority-setting for patient safety programmes and research. *Journal of*  
37 *Health Services Research & Policy* 2011;16(3):141-46.
- 38  
39  
40 60. National Health and Medical Research Council. How to Compare the costs and benefits:  
41 evaluation of the economic evidence. Canberra: Commonwealth of Australia, 2001
- 42  
43  
44 61. National Health and Medical Research Council of Australia. National Statement on Ethical  
45 Conduct in Human Research. Canberra: NHMRC, 2007 (updated 2009).
- 46  
47  
48 62. University of New South Wales A. Research Code of Conduct: Version 1.0 Effective 27 April  
49 2009.
- 50  
51  
52  
53  
54  
55  
56  
57  
58  
59  
60

1  
2  
3 **Economic evaluation of Australian acute care accreditation (ACCREDIT-CBA [Acute]): study**  
4 **protocol for a mixed-method research project**  
5

6 **ABSTRACT**  
7

8  
9 **Introduction:** The Accreditation Collaborative for the Conduct of Research, Evaluation and  
10 **Designated Investigations through Teamwork – Cost-Benefit Analysis (ACCREDIT-CBA [Acute])**  
11 study is designed to determine and make explicit, the costs and benefits of Australian acute care  
12 accreditation, and to determine the effectiveness of acute care accreditation in improving patient  
13 safety and quality of care. The cost-benefit analysis framework will be provided in the form of an  
14 interactive model for industry partners, health regulators and policy makers, accreditation agencies  
15 and acute care service providers.  
16  
17  
18  
19  
20  
21

22  
23 **Methods and Design:** The study will use a mixed-method approach to identify, quantify and  
24 monetise the costs and benefits of accreditation. Surveys, expert panels, focus groups, interviews,  
25 and primary and secondary data analysis will be used in cross-sectional and case study designs.  
26  
27  
28  
29

30 **Ethics and Dissemination:** The University of New South Wales Human Research Ethics Committee  
31 has approved this project (approval number HREC 10274). The results of the study will be reported  
32 via peer-reviewed publications, conferences and seminar presentations, and will form part of a  
33 doctoral thesis.  
34  
35  
36  
37  
38  
39  
40  
41  
42  
43  
44  
45  
46  
47  
48  
49  
50  
51  
52  
53  
54  
55  
56  
57  
58  
59  
60

**ARTICLE SUMMARY****Article focus**

- This study uses economic evaluation techniques to assess the costs and benefits of acute care accreditation in Australian health services. The objective is to provide an interactive model of the costs and benefits from the perspective of a broad range of stakeholders. The model can also be used to assess the effectiveness of accreditation in improving patient safety and quality of care.

**Key messages**

- Despite widespread implementation, the costs and benefits of acute care accreditation have not been clearly defined, identified and quantified.
- Economic evaluation techniques such as costs-benefit analysis can help determine whether accreditation is an effective driver of patient safety and quality of care.
- This protocol provides a unique specifically designed framework, and a number of purpose built tools, to systematically assess the costs and benefits of acute care accreditation.

**Strengths and limitations of this study**

- The strength of this study lies in using economic evaluation techniques to establish the role of acute care accreditation as an effective audit tool; this has not been accomplished previously.
- One limitation in determining the impact of accreditation in Australia is the lack of a suitable control group given the widespread implementation of accreditation.

## INTRODUCTION

Despite its widespread implementation, the costs and benefits of acute health services accreditation have not been clearly defined, identified and quantified.<sup>1-5</sup> An economic framework is needed to systematically assess and compare these costs and benefits. This study protocol applies economic evaluation techniques using a purpose-designed framework to accomplish- answer our research question as to whether this in-acute care accreditation in Australia is effective in improving patient safety and quality of care.

### Accreditation of acute health services in Australia

The International Society for Quality in Health Care (ISQua), the peak body for health services accreditation, defines accreditation as “public recognition of the achievement of standards by an organisation demonstrated through independent assessment in relation to set standards”.<sup>6,6</sup> Accreditation has been widely implemented following the establishment of the Joint Commission on Accreditation of Hospitals (now, the Joint Commission) in the United States (US) in 1951.<sup>7,8</sup> In Australia, accreditation was first adopted for acute care services in 1974,<sup>9</sup> with the Australian Council on Healthcare Standards (ACHS) as the main accrediting agency. Over subsequent years, ACHS developed the Evaluation and Quality Improvement Program (EQUIP). This accreditation programme comprises two external surveys within a four-year accreditation cycle.<sup>10</sup> Facilities are assessed by trained external surveyors using standards developed by ACHS in consultation with health care industry experts.<sup>10</sup> As part of wider health system reforms implemented by the Australian Commonwealth Government, recently approved legislation requires all hospitals and day procedure services in Australia to be assessed by an accreditation provider approved by the Australian Commission on Safety and Quality in Health Care (ACSQHC) using newly developed National Safety and Quality Health Service (NSQHS) standards.<sup>11</sup> Australian acute care accreditation is the focus of this study. We include acute and high risk inpatient activity in our definition of acute care facilities (ACFs) in this protocol.

### Economic evaluation of health interventions

Health costs are a significant proportion of gross domestic product, averaging 9.6% in 2010 for

1  
2  
3 Organisation for Economic and Co-operation Development countries.<sup>12</sup> This, combined with persistent  
4 evidence of harm during health service delivery,<sup>13-16</sup> has resulted in an increasing international focus  
5 on accountability and safety in health care.<sup>17 18</sup> Economic evaluation addresses these issues by using  
6 a systematic framework to identify and compare the costs and benefits of a policy or intervention to  
7 determine whether implementation is effective in achieving stated aims, and also to compare different  
8 policy proposals and interventions.<sup>19-21</sup> In cost-benefit analysis (CBA) the costs and benefits are each  
9 expressed in monetary terms. This contrasts with other techniques such as cost-effectiveness  
10 analysis (CEA) or cost-utility analysis (CUA) which are used in assessing health technologies. In CEA  
11 and CUA the common outcome denominator is not monetised, but expressed in terms of a common  
12 utility measure such as Quality Adjusted Life Years.<sup>22-25</sup> CBA is advocated where there is broader  
13 range of outcomes, and is usually a requirement for submitting a regulatory impact statement for  
14 Australian government approval.<sup>19</sup> CBA seems justified as the most appropriate model to use in an  
15 Australian health services context as the NSQHS standards cover both organisational and clinical  
16 outcomes, which are best measured using a common monetary denominator. Although CBA can be  
17 used as an allocative efficiency tool for comparing different projects, the requirement to make the  
18 costs and benefits explicit in the analysis framework can help clarify the goals, costs, and benefits,  
19 providing input into the design of future accreditation systems in healthcare.<sup>26</sup>

20  
21  
22  
23  
24  
25  
26  
27  
28  
29  
30  
31  
32  
33  
34  
35  
36  
37  
38  
39  
40  
41  
42  
43  
44  
45  
46  
47  
48  
49  
50  
51  
52  
53  
54  
55  
56  
57  
58  
59  
60

Modelling the costs and benefits of a complex intervention, such as accreditation, in a complex system, such as an ACF, is a significant undertaking.<sup>27</sup> Given the lack of precedent discussed above, we have developed a unique framework, and a number of purpose-built tools specifically designed for evaluating acute care accreditation. Our SIQNS framework is synthesized from several sources,<sup>20 21 28</sup> and comprises five discrete activities: 1) **Scope** and objectives; 2) **Identify costs and benefits**; 3) **Quantify costs and benefits**; 4) calculate **Net social benefits**; and 5) **Sensitivity analysis** (Figure 1).

**Figure 1: SIQNS framework**





### Scope and objectives

The aim of the study is to create an interactive model that can be accessed by health service providers, accreditation bodies, quality and safety agencies, governments, and researchers to both test the assumptions in the model, and to determine the cost-benefit calculations of acute care accreditation at both a national and local service level.<sup>28</sup> The lack of research in this field, and complexity of both the intervention (accreditation) and system (acute health care), indicates that an important objective will be to make explicit the costs and benefits of accreditation.<sup>1 2 27 29 30</sup>

Establishment of the study parameters will be informed by a review of the research literature and analysis of the characteristics of accredited ACFs. These activities will also help determine the indicator selection process to identify and quantify the benefits of accreditation. A critical element is in identifying the stakeholders involved in the acute care accreditation process. Although accreditation

1  
2  
3 agencies and ACFs are the most obvious groups affected, a broader societal framework is required  
4 when assessing regulatory impact to ensure equity and impact are meaningfully accounted for in the  
5 analysis.<sup>20</sup>  
6  
7

8  
9  
10 Our initial analysis has identified a key constraint, in that ACFs do not account for accreditation  
11 activities as a separate cost item.<sup>31</sup> Our approach, outlined below, is to accept that large scale data  
12 gathering on costs would not be possible within the scope of the study and will be a challenge over  
13 time. Instead, we will use a smaller study sample and have this validated by an expert panel.  
14 Accreditation benefits, in terms of both clinical and organisational outcomes, are more likely to be  
15 assessed using secondary data, but are more difficult to identify partly due to a lack of clarity in terms  
16 of measurable endpoints. In addition, a full impact analysis of all benefits for all stakeholders will be  
17 outside the study scope. A further constraint is that an economic appraisal would ideally be conducted  
18 with a control group (either randomly assigned or with data collected for a before and after  
19 comparison) in order to compare different outcomes.<sup>32</sup> This is not possible in Australia where acute  
20 care accreditation is widely implemented (93% of public hospital beds in 2010, and 84% of private  
21 hospital beds in 2008-2009).<sup>33</sup> However, we can analyse data before and after introduction of new  
22 standards, review indicator activity against accreditation scores, and analyse changes over time.  
23  
24  
25  
26  
27  
28  
29  
30  
31  
32  
33  
34  
35

### 36 Identify costs and benefits

37  
38 To identify the incremental costs of accreditation, we need to determine costs that are only incurred  
39 due to the accreditation process.<sup>34</sup> We will first review the stakeholders for potential costs and exclude  
40 transfer payments to avoid double counting. We will then assess costs for a small number of ACFs  
41 (n=10) using our purpose designed assessment tool based on questions posed in similar cost  
42 surveys,<sup>35-38</sup> and the Business Cost Calculator which has been designed to help Australian  
43 businesses compute business compliance costs.<sup>7 10 39 40</sup>  
44  
45  
46  
47  
48  
49  
50

51 International accreditation agencies, e.g., the Joint Commission, ACHS and Accreditation Canada,  
52 identify improvements in patient safety and quality of care as the main benefits of health services  
53 accreditation.<sup>7 10 40</sup> Within an Australian context, we reviewed the benefits outlined by ACSQHC in a  
54 recent regulatory impact statement on the new NSQHS standards.<sup>41</sup> In addition the Australian  
55  
56  
57  
58  
59  
60

1  
2  
3 National Health Performance Authority's (NHPA's) performance and accountability framework has  
4 defined the indicators used to assess effectiveness of care in ACFs. We will map our stakeholder  
5 analysis with the ACSQHC benefits and the NHPA adverse and sentinel event measures to identify  
6 quality and safety indicators.  
7  
8  
9

10  
11  
12 In our choice of indicators we need to distinguish whether a lack of change in the indicator is due to a  
13 lack of compliance with the accreditation standard, or whether compliance with the standard results in  
14 change in an indicator. We have adapted the approach used in measuring quality outcomes in US  
15 hospitals.<sup>42</sup> This recommends that indicators must meet four key accountability criteria: research –  
16 robust evidence; accuracy – whether the process has been carried out satisfactorily; proximity – a  
17 clear and direct link between accreditation and the indicator; and, no adverse effects – no unintended  
18 or unwanted actions. As accreditation is usually just one facet of a quality and safety framework, we  
19 have added a further criterion – specificity – to determine how easy it is to isolate the effects of  
20 accreditation from other safety and quality measures. This is important when determining the  
21 effectiveness of accreditation versus other safety and quality initiatives.<sup>43</sup> We specify the type of  
22 indicator, as process indicators are often a preferred measure of quality over outcome indicators. This  
23 is due to a more direct link between the indicator and the process being measured (the issue of  
24 proximity in Chassin's accountability criteria)<sup>42</sup> but this can also lead to estimation problems as only a  
25 narrow range of factors are considered. Outcome indicators have the advantage in that the data are  
26 often collected routinely, but may need to be adjusted for other factors such as patient acuity and  
27 complexity.<sup>43-45</sup> We will need to consider whether the chosen indicators need to be weighted to reflect  
28 both suitability (in terms of adherence to the accountability criteria), and applicability (quality of data  
29 collection and adjustment for patient mix). We will ask an expert panel to review and validate our  
30 indicator selections prior to quantifying the indicators for further analysis.  
31  
32  
33  
34  
35  
36  
37  
38  
39  
40  
41  
42  
43  
44  
45  
46  
47  
48

### 49 **Quantify costs and benefits**

50  
51 Once the costs have been identified for each ACF in our sample, we will need to ensure the results  
52 can be scaled up and assessed on a national basis. Although costs for initial accreditation can be  
53 higher than for ongoing accreditation,<sup>38 46</sup> we assume ongoing accreditation costs for our sample, but  
54 include questions on estimating the cost of implementing the new national standards in the survey.  
55  
56  
57  
58  
59  
60

1  
2  
3 Under a CBA model we use monetary values as the common denominator, we will  
4 need to monetise the benefits identified. The techniques used will depend on the availability of pricing  
5 and market data. For example, clinical outcome indicators (such as hospital acquired infection rates,  
6 or complications resulting from inpatient falls) can be matched to activity-based costing codes. This  
7 data can be used to determine the potential cost savings from a reduction in infection or fall rates.  
8 Where we identify an indicator but do not see a change in measurement, we will include this in our  
9 sensitivity analysis, for example, the costs associated with reducing hospital acquired infections by a  
10 stated amount. Where indicators can be identified and quantified but lack pricing or market data, we  
11 will monetise the effects using techniques such as revealed and stated preference methods, where  
12 possible.<sup>21 26 47</sup>

### 23 Calculate net social benefit

24 Given the costs and benefits are likely to occur at different times, we will need to adjust the timing  
25 differentials using an appropriate discount rate. For CBA both the net social benefit (NSB) and the  
26 benefits-cost ratio (BCR) are calculated. The NSB uses a net present value method to derive an  
27 absolute measure of whether the discounted (net) benefits are greater than the discounted (net) costs  
28 when assessing proposals in a regulatory impact statement.<sup>19 22</sup> The BCR is derived by dividing the  
29 net benefits by the net costs to determine an effective return on the costs and is used where the  
30 absolute size of the investment is a determining factor, for example in a resource constrained  
31 environment. However, the BCR is subject to more variation depending on how the outcomes are  
32 treated.<sup>19 20 22</sup>

33  
34  
35  
36  
37  
38  
39  
40  
41  
42  
43 With questions on the table about whether accreditation is more of an audit tool or quality  
44 improvement tool,<sup>1 8</sup> CBA can address both these issues by not only comparing accreditation with  
45 other safety and quality programmes, but also with other methods of regulatory compliance. Although  
46 there is not a good counterfactual to accreditation due to widespread implementation,<sup>33</sup> we can  
47 estimate the relative effectiveness of accreditation versus alternative forms of audit. Examples include  
48 the additional requirements that a private ACF would need to meet to qualify for private health  
49 funding, or additional auditing that would be required for public ACFs in the absence of accreditation.  
50  
51  
52  
53  
54  
55  
56  
57  
58  
59  
60

### Sensitivity analysis

A sensitivity analysis is an essential tool to describe the impact of changes in assumptions and variables on our SIQNS framework,<sup>20</sup> especially given the constraints discussed. We will review the assumptions in the model and run the NSB and BCR calculations over a range of values. For some costs and benefits, including qualitative outcomes, monetisation will be beyond the scope of this study and these items will not be included in the NSB or BCR calculations. Nevertheless, these costs and benefits can still be included in the final model and used to compare other programmes with similar NSB or BCR outcomes but where the non-monetised items may be a deciding factor.

### ACCREDIT project overview

The ACCREDIT CBA [Acute] study is the sixth of 12 studies under the ACCREDIT (Accreditation Collaborative for the Conduct of Research, Evaluation and Designated Investigations through Teamwork) research collaboration,<sup>28 48 49</sup> funded by the Australian Research Council through its industry Linkage Program.<sup>50</sup> The ACCREDIT collaboration involves researchers in the Centre for Clinical Governance Research and Centre for Health Systems and Safety Research in the Australian Institute of Health Innovation (AIHI) at the University of New South Wales (UNSW), Australia. The ACCREDIT research team benefits from a high-profile international advisory group containing leading researchers in health safety and quality from the United Kingdom, Spain and Sweden. The collaboration includes two leading health safety and quality bodies (ACSQHC and the Clinical Excellence Commission [CEC]) plus three of the major Australian health services accreditation agencies: ACHS, Australian General Practice Accreditation Limited (AGPAL), and the Aged Care and Standards Accreditation Agency (ACSAA).

### METHODS AND ANALYSIS

The methods to obtain and analyse data needed to build the CBA model are discussed below using each of the five SIQNS activities. For each survey tool, focus group, and expert panel described in the following sections, the ACCREDIT research team will send an electronic invitation to potential participants containing the study information and consent forms approved by the UNSW Human Research Ethics Committee (HREC).<sup>51</sup> Those individuals wishing to participate will be asked to contact the UNSW research team and will be invited to either attend the relevant research activity. at

9

UNSW, or be interviewed via telephone. The research activities will last approximately one hour, and will be digitally recorded and professionally transcribed.

### **SIQNS activity 1: scope and objectives**

The first activity is to review the scope and constraints of the study design, and to establish the study parameters. This will be completed through three tasks: literature reviews; analysis of accredited ACFs; and stakeholder identification.

A literature review covering two general issues will be conducted. First, an investigation of the cost and benefits of accreditation, in health and related fields, and second, the compliance costs and methodologies used in non-health industries.

Analysis of accredited ACFs will be conducted using data from the ACHS national accreditation database, using accreditation survey data from 2003 to 2011. The purpose is to assess the characteristics of accredited ACFs: (bed size; ownership and funding structure; geographic location (by state or territory); type of survey; and whether these are linked to accreditation outcomes. During 2007 ACHS made changes to the mandatory criteria assessed in the surveys with the changeover from EQUiP3 to EQUiP4. Therefore, econometric analysis of the main study variables will be over the full period (2003-2011), accompanied by analysis of individual standards as predictors of accreditation outcomes in the different EQUiP programmes. This part of the study will provide guidance for reviewing the structure of the ACFs targeted in the costs study.

To evaluate the stakeholder base, the ACCREDIT research team will send an electronic invitation to senior health services researchers at AIHI, UNSW, to participate in a focus group.<sup>52</sup> Those willing to participate will be asked to contact the ACCREDIT team. The focus group will take place at UNSW using the general demographic and content questions from the Stakeholder Analysis Tool (Table 1).

**Table 1: Stakeholder Analysis Tool**

General demographic questions

- What is your age?

- What is your gender?
- What are your highest qualifications?
- What is your research discipline?
- How many years have you worked in health services research?
- How many years have you worked as a healthcare professional?
- How many first author peer- reviewed publications do you have?
- How many second or subsequent author publications do you have?

#### Content questions

1. Who are the key stakeholders in acute health care in Australia?
2. Please classify these as either:
  - a) Key stakeholders in acute care services who either contribute to, or influence, the costs and benefits of accreditation; or
  - b) Key stakeholders in acute care services who do not contribute directly to accreditation costs or benefits
3. Please identify the costs and benefits for each stakeholder identified in 2- a)

In keeping with the tenets of an inclusive societal framework,<sup>53</sup> stakeholders from group 2a) will be included in the list of identified stakeholders. Those in group 2b) will be closely reviewed for inclusion based on their knowledge and perspective. The group of identified stakeholders will be used throughout the study and referenced when considering the individual costs and benefits to ensure the broader social framework is addressed.

#### **SIQNS activity 2: identify costs and benefits**

The aim of this activity is to estimate the incremental costs and the benefits of accreditation using a variety of purpose-built tools to both assess and validate our results. One of the main costs identified in previous research has been the preparation for external surveys in the accreditation cycle.<sup>9 35-38 54</sup>

To recruit subjects, ~~in the sample survey to assess incremental costs,~~ the UNSW research team will send a study n-invitation ~~to participate in the study~~ to the accreditation partners to forward on to the ACFs they accredit. The ACFs agreeing to participate will be characterised according to: facility specialisation (for example, teaching hospital); location (metropolitan or rural); and size (large, medium or small). One from each category (n=10) will be randomly selected and approached by the UNSW research team. Semi-structured interviews will be conducted with Finance Managers, Quality Managers, and General Managers as directed by the ACF, using the questions set out in the Incremental Costs Audit Tool (Table 2).

**Table 2: Incremental Costs Audit Tool**

1. Demographic details:
  - a. Bed size of facility
  - b. Location (State or Territory, and whether rural or metropolitan)
  - c. Funding structure (public or private)
  - d. Specialisation of the facility (e.g. teaching hospital, mental health, correctional facility or other)
  - e. Job description of respondent
2. Is this your first accreditation cycle?
3. Please provide details, where possible by year incurred, of activity based costing for the following activities in relation to the accreditation cycle:
  - a. Notification: implementing recommendations from the survey
  - b. Education: staff meetings, working groups and education sessions for new staff, and to accommodate changes in standards
  - c. Record-keeping: developing and maintaining policies and documents
  - d. Enforcement: staff allocated to assist surveyors, and in pre- and post-survey briefings
  - e. Publication and documentation: survey and self-assessment preparation
  - f. Procedural: collecting consumer feedback relating to accreditation standards
  - g. Other: details of staff involved in surveying other facilities
  - h. Purchases: survey fees and consultancy fees relating to accreditation
4. What do you estimate will be the difference in costs (if any) for complying with the new National Safety and Quality Health Service Standards?

Given the relatively small size of the survey sample, we will validate the results using an expert panel consisting of: accreditation surveyors; leading accreditation researchers; accreditation agencies; health quality consultants; and government health quality improvement agencies. We will also invite staff and surveyors from ACFs who agreed to participate, but not selected for interviews, to take part in the panel. A de-identified costs summary will be given to participants in advance, and the panel will be asked to discuss the questions set out in the Incremental Costs Validation Tool (Table 3).

**Table 3: Incremental Costs Validation Tool**

1. Do you think the results from the audit tool are representative of the current accreditation process?



2. If these costs are not representative, what is your estimate of the costs?
3. Are there other incremental costs that have not been included?
4. What would be your estimate of costs identified in question 3?

The outcomes of both the incremental costs audit and validation tools will be assessed against results of the stakeholder analysis. Total costs will be estimated at a national level.

To determine the specific benefits of accreditation we will use our Indicator Assessment Tool (Table 4) to identify the main topics in ~~both the ACHS EQulP5 survey and~~ the new NSQHS standards and identify the relevant standard in the ACHS EQulP5 survey. We will then review a range of process and outcome indicators including adverse events highlighted in the NHPA framework,<sup>55</sup> as well as the outcome indicators and sentinel events collected by the Australian Institute of Health and Welfare.<sup>56 57</sup>

**Table 4: Indicator Assessment Tool**

| Intervention Topic             |                                                                                                                          |
|--------------------------------|--------------------------------------------------------------------------------------------------------------------------|
| <b>Accreditation Standards</b> | List relevant standards relating to the intervention topic                                                               |
| NSQHS Standards                | <u>Identify the relevant</u> <del>Whether the intervention is included in the new</del> NSQHS standards                  |
| ACHS EQulP5                    | Whether the intervention is a mandatory criteria in EQulP5                                                               |
| <b>Indicator</b>               | Description of indicator                                                                                                 |
| <b>Indicator type</b>          | Whether the indicator is process or outcome based                                                                        |
| <b>Research</b>                | What is the evidence base that compliance with the standard affects the indicator?                                       |
| <b>Accuracy</b>                | How accurate is the indicator in terms of measuring compliance with the accreditation standard?                          |
| <b>Proximity</b>               | How close is the link between the standard and the indicator, is there a causal chain?                                   |
| <b>No adverse effects</b>      | What is the risk of avoiding adverse effects?                                                                            |
| <b>Specificity</b>             | <u>Is it</u> possible to isolate the effects of accreditation on the indicator from other safety and quality programmes? |
| <b>Associate programmes</b>    | Related programmes initiated by state or federal governments, or healthcare agencies                                     |

1  
2  
3  
4  
5 The results of our indicator selection process will be validated using the established expert panel. A  
6 summary of the potential indicators and scores from the Indicator Assessment Tool will be given to  
7 participants in advance of the panel. The interviews with the panel will use the semi-structured  
8 questions in the Indicator Validation Tool (Table 5).  
9  
10  
11  
12  
13

14 **Table 5: Indicator Validation Tool**

- 15  
16 1. Do you think the indicators selected using the Indicator Assessment Tool are representative of the benefits  
17 of accreditation?  
18  
19 2. If these are not representative, what indicators would you add, and why?  
20  
21 3. For the indicators you have identified, would you recommend attaching a weighting to the monetized values,  
22 and if so what weighting would you recommend?  
23  
24

25  
26 The results of the panel will be used to formulate a list of benefit indicators. These will then be  
27 mapped to appropriate databases to look for evidence of improvement over accreditation cycles or  
28 following introduction of a relevant standard. Indicators with low scores from the Indicator Assessment  
29 Tool, especially for the proximity and specificity criteria, will be evaluated for inclusion or rejection.  
30  
31

32  
33 Since this is a high level description of the protocol we have not detailed the exact methods for  
34 statistical analysis as these will depend on the indicators selected. The main difficulty is in  
35 determining a causal effect where there is no control group given the widespread implementation of  
36 accreditation, and we will need to select the appropriate economic evaluation techniques depending  
37 on the results.  
38  
39  
40  
41  
42  
43

### 44 **SIQNS activity 3: quantify costs and benefits**

45  
46 Costs will be scaled up nationally according to facility-type both by an actual dollar amount and as a  
47 percentage of total costs. Identified benefits will be quantified and monetised using a number of  
48 techniques depending on the type of indicators validated by our expert panel. For example, clinical  
49 outcome indicators can be matched to the ACSQHC's Costs of Hospital Acquired Diagnoses activity  
50 based costing codes.<sup>58 59</sup> Process measures are more difficult to quantify but techniques for valuing  
51 non-market costs such as revealed and stated preference will be used to monetise the benefits where  
52  
53  
54  
55  
56  
57  
58  
59  
60

possible.<sup>21 22 47</sup>

#### SIQNS activity 4: calculate net social benefit

Our interactive CBA model will be populated with the costs and benefits identified and quantified in SIQNS activities 2 and 3. Costs will be added to the model and allocated by year incurred during the accreditation cycle. The benefits will be allocated depending on the type of indicator used. For example, for clinical indicators such as hospital acquired infection rates, the cost savings from a reduction in infection rates per year nationally can be monetised and modelled. Where the timing is not clear, we will assign equal weights over the expected time horizon and discount accordingly. Australian Government approved discount rates will be applied to the model in order to discount the cost and benefit cash flows back to a baseline year.<sup>19 60</sup> Both the NSB and BCR (Equations 1 and 2) will be calculated for the costs and benefits that have been monetised. Non-monetised costs and benefits will be included for comparative analysis if they can be quantified.

$$\text{Equation 1: NSB} = \sum_{t=1}^n \frac{(B_t - C_t)}{(1 + r)^t}$$

$$\text{Equation 2: BCR} = \frac{\sum_{t=1}^n B_t / (1 + r)^t}{\sum_{t=1}^n C_t / (1 + r)^t}$$

**Legend for Equation 1 and 2:**  $B_t$  is the sum of benefits in year  $t$ ;  $C_t$  is sum of costs in year  $t$ ;  $n$  is the lifetime of the accreditation cycle or expected time horizon, in years; and  $r$  is the discount rate used.

#### SIQNS activity 5: sensitivity analysis

In order to determine the sensitivity of inputs into the model, NSB and BCR will be recalculated for a range of values (plus and minus 1%, 5% and 10% of the total values) for each individual cost and benefit that is more than 10% of the total. In addition, the model will be run with discount rates at plus and minus two and five percentage points from the base discount rates used in order to test the duration sensitivity of the model.

#### ETHICS AND DISSEMINATION

The UNSW HREC has approved the ACCREDIT-CBA (Acute) study proposal (approval number

1  
2  
3 HREC 10274). The study will be conducted in accordance with the UNSW Research Code of Conduct  
4 and Australian National Health and Medical Research Council (NHMRC) guidelines.<sup>61 62</sup> As such, all  
5 project data will be de-identified prior to publication and stored securely for a minimum of seven  
6 years. Contact details of the research team will be given to participants in the study so that any  
7 complaints or concerns can be addressed. The results of the study will be submitted for publication in  
8 selected journals and presented ~~to~~ at national and international conferences and seminars. The  
9 findings will also form part of a doctoral thesis.  
10  
11  
12  
13  
14  
15

## 16 17 18 **CONCLUSION**

19 Although accreditation of acute health services has been widely adopted in Australia, little is currently  
20 known about the costs and benefits of the process, and whether accreditation is a cost-effective tool  
21 in improving patient safety and quality of care. This study aims to create a framework to answer these  
22 questions and to make the e-ccosts and benefits of accreditation explicit. This will, in turn, in-order to  
23 inform debate on the important issue of how best to monitor and improve patient safety and quality of  
24 care in acute health services.  
25  
26  
27  
28  
29  
30

31  
32 **ACKNOWLEDGEMENTS:** We acknowledge the staff of the industry partners (ACHS, AGPAL,  
33 ACSAA) and the quality improvement agencies (ACSQHC and CEC) who are providing support for  
34 the project.  
35  
36  
37  
38

39 **COMPETING INTERESTS:** The authors have no competing interests to declare.  
40  
41  
42

43 **FUNDING AND ETHICS:** This research is supported under the Australian Research Council's  
44 Linkage Projects scheme (project LP100200586), and NHMRC Program grant number 568612.  
45 Although the ARC and NHMRC have contributed to funding the research, the final responsibility for all  
46 research activities, including the decision to publish the results of the studies, resides with UNSW.  
47 Ethics approval was granted by the UNSW Human Research Ethics Committee (approval number  
48 HREC 10274).  
49  
50  
51  
52  
53  
54

55  
56 **AUTHORS' CONTRIBUTIONS:** All authors contributed to the writing of the protocol and will assist in  
57  
58  
59  
60

1  
2  
3 the conduct of the project.  
4  
5  
6  
7  
8  
9  
10  
11  
12  
13  
14  
15  
16  
17  
18  
19  
20  
21  
22  
23  
24  
25  
26  
27  
28  
29  
30  
31  
32  
33  
34  
35  
36  
37  
38  
39  
40  
41  
42  
43  
44  
45  
46  
47  
48  
49  
50  
51  
52  
53  
54  
55  
56  
57  
58  
59  
60

For peer review only

## REFERENCES

1. Shaw CD. Evaluating accreditation. *International Journal for Quality in Health Care* 2003;15(6):455-56.
2. Braithwaite J, Greenfield D, Westbrook J, Pawsey M, Westbrook M, Gibberd R, et al. Health service accreditation as a predictor of clinical and organisational performance: a blinded, random, stratified study. *Quality & Safety in Health Care* 2010;19(1):14-21.
3. Greenfield D, Pawsey M, J. B. The role and impact of accreditation on the healthcare revolution [O papel e o impacto da acreditação na revolução da atenção à saúde]. *Acreditação*, 2012;1(2):64-67.
4. Greenfield D, Braithwaite J. Health sector accreditation research: a systematic review. *International Journal for Quality in Health Care* 2008;20(3):172-83.
5. Hinchcliff R, Greenfield D, Moldovan M, Westbrook JI, Pawsey M, Mumford V, et al. Narrative synthesis of health service accreditation literature. *Quality and Safety in Health Care*. Published Online First, 4 October 2012 : doi: 10.1136/bmjqs-2012-000852.
6. ISQuA. The International Society for Quality in Health Care Ltd - Articles of Association, 2011.
7. The Joint Commission. Benefits of Joint Commission Accreditation, [http://www.jointcommission.org/accreditation/accreditation\\_main.aspx](http://www.jointcommission.org/accreditation/accreditation_main.aspx), Date accessed: Aug, 2012.
8. Greenfield D, Pawsey M, Braithwaite J. Accreditation: a global regulatory mechanism to promote quality and safety. In: Sollecito W, Johnson J, editors. *Continuous Quality Improvement in Health Care: Theory, Implementations, and Applications*. 4th ed. USA: Jones and Bartlett, 2013:pp 513-36.
9. Fairbrother G, Gleeson M. EQUiP accreditation: Feedback from a Sydney teaching hospital. *Australian Health Review* 2000;23(1).
10. Australian Council on Healthcare Standards. The ACHS National Report on Health Services Accreditation Performance 2009-2010. Sydney, 2011.
11. Commonwealth Government of Australia. A National Health and Hospitals Network for Australia's Future. Canberra: Department of Health and Ageing, 2010.
12. OECD. Health Data. Institution, 2012. <http://www.oecd.org/els/healthpoliciesanddata/oecdhealthdata2012.htm>. Date accessed; Nov 2012.

- 1  
2  
3 13. Kohn L, Corrigan J, Donaldson M. To Err is Human: Building a safer health system. Committee on  
4  
5 Quality of Health Care in America - Institute of Medicine, 2000.
- 6  
7 14. Runciman WB, Webb RK, Helps SC, Thomas EJ, Sexton EJ, Studder DM, et al. A comparison of  
8  
9 iatrogenic injury studies in Australia and the USA II: reviewer behaviour and quality of care.  
10  
11 *International Journal for Quality in Health Care* 2000;12(5):379-88.
- 12  
13 15. De Vries EN, Ramrattan MA, Smorenburg SM, Gouma DJ, Boermeester MA. The incidence and  
14  
15 nature of in-hospital adverse events: A systematic review. *Quality and Safety in Health Care*  
16  
17 2008;17(3):216-23.
- 18  
19 16. Hauck K, Zhao X, Jackson T. Adverse event rates as measures of hospital performance. *Health*  
20  
21 *Policy* 2012;104(2):146-54.
- 22  
23 17. Squires D. Using Comparative Effectiveness Research to Inform Policymaking. New York: The  
24  
25 Commonwealth Fund, 2012.
- 26  
27 18. National Health and Hospitals Reform Commission. Beyond the Blame Game: Accountability and  
28  
29 performance benchmarks for the next Australian Health Care Agreements. Canberra: NHHRC,  
30  
31 2008.
- 32  
33 19. Australian Government. Best Practice Regulation Guidance Note: Decision rules in regulatory  
34  
35 cost-benefit analysis. Canberra: OBPR, 2009
- 36  
37 20. Commonwealth of Australia. Handbook of Cost-Benefit Analysis. Canberra: Department of  
38  
39 Finance and Administration, 2006.
- 40  
41 21. HM Treasury. The Green Book: Appraisal and Evaluation in Central Government, London: TSO,  
42  
43 2003 (updated 2011)
- 44  
45 22. Drummond MF, Sculpher M, Torrance G, O'Brien B, Stoddart G. *Methods for the Economic*  
46  
47 *Evaluation of Health Care Programmes*. Third ed: Oxford Medical Publications, 2005.
- 48  
49 23. Gray A, Clarke P, Wolstenhome J, Wordsworth S. *Applied Methods of Cost-Effectiveness*  
50  
51 *Analysis in Health Care*: Oxford University Press, 2011.
- 52  
53 24. National Institute for Health and Clinical Excellence. Updated guide to the methods of technology  
54  
55 appraisal: Issued June 2008: NICE, 2008.
- 56  
57 25. Pharmaceutical Benefits Advisory Committee. Guidelines for the Pharmaceutical Industry on  
58  
59 Preparation of Submissions to the Pharmaceutical Benefits Advisory Committee: including major  
60  
60 submissions involving economic analyses. Canberra: Australian Government Department for

- 1  
2  
3 Health and Ageing, 1995.
- 4  
5 26. McIntosh E, Clarke B, Frew E, Louviere J. *Applied Methods of Cost-Benefit Analysis in Health*  
6  
7 *Care*: Oxford University Press, 2010.
- 8  
9 27. Shiell A, Hawe P, Gold L. Complex interventions or complex systems? Implications for health  
10  
11 economic evaluation. *BMJ* 2008;336(7656):1281-83.
- 12  
13 28. Braithwaite J, Westbrook J, Johnston B, Clark S, Brandon M, Banks M, et al. Strengthening  
14  
15 organizational performance through accreditation research - a framework for twelve interrelated  
16  
17 studies: the ACCREDIT project study protocol. *BMC Research Notes* 2011;4(1):390.
- 18  
19 29. Øvretveit J. Quality evaluation and indicator comparison in health care. *The International Journal*  
20  
21 *of Health Planning and Management* 2001;16(3):229-41.
- 22  
23 30. Flodgren G, Pomey M, Taber S, Eccles M. Effectiveness of external inspection of compliance with  
24  
25 standards in improving healthcare organisation behaviour, healthcare professional behaviour or  
26  
27 patient outcomes. *Cochrane database of systematic reviews (Online)* 2011(11).
- 28  
29 31. Appleyard G, John Ramsay and Associates Pty Ltd. Cost Analysis of Safety and Quality  
30  
31 Accreditation in the Australian Health System. Australian Commission for Safety and Quality in  
32  
33 Health Care, 2008.
- 34  
35 32. Imbens GW, Wooldridge JM. Recent Developments in the Econometrics of Program Evaluation.  
36  
37 *Journal of Economic Literature* 2009;47(1):5-86.
- 38  
39 33. Australian Institute of Health and Welfare. Australia's hospitals 2009–10: at a glance. Health  
40  
41 services series no.39. Cat. no. HSE 106. Canberra: AIHW, 2011.
- 42  
43 34. Productivity Commission. General Practice Administrative and Compliance Costs - Research  
44  
45 Report. Canberra: Productivity Commission, 2003.
- 46  
47 35. Foster BJ, Gipe B. A detailed analysis of the costs of a JCAHO survey. *Cost & quality quarterly*  
48  
49 *journal* : CQ 1997;3(1):19-24.
- 50  
51 36. Mihalik G, Scherer M, Schreter R. The High Price of Quality: A Cost Analysis of NCQA  
52  
53 Accreditation. *Journal of Health Care Finance* 2003;29(3):38.
- 54  
55 37. Rockwell DA, Pelletier LR, Donnelly W. The cost of accreditation: one hospital's experience.  
56  
57 *Hospital & Community Psychiatry: A Journal of the American Psychiatric Association*  
58  
59 1993;44(2):151-55.
- 60  
61 38. Zarkin GA, Dunlap LJ, Homs G. The costs of pursuing accreditation for methadone treatment



- 1  
2  
3 sites: Results from a national study. *Evaluation Review* 2006;30(2):119-38.  
4  
5 39. Australian Government. Business Cost Calculator. Department of Finance and Deregulation.  
6  
7 Canberra: OBPR, 2008.  
8  
9 40. Accreditation Canada. Canadian Health Accreditation Report - Required Organizational Practices:  
10  
11 Emerging Risks, Focused Improvements. Ottawa: Accreditation Canada, 2012.  
12  
13 41. Australian Commission on Safety and Quality in Health Care. National Safety and Quality Health  
14  
15 Service Standards and their use in a Model National Accreditation Scheme: Decision Regulatory  
16  
17 Impact Statement. Sydney: ACSQHC, 2010.  
18  
19 42. Chassin MR, Loeb JM, Schmaltz SP, Wachter RM. Accountability Measures — Using  
20  
21 Measurement to Promote Quality Improvement. *New England Journal of Medicine*  
22  
23 2010;363(7):683-88.  
24  
25 43. Mant J. Process versus outcome indicators in the assessment of quality of health care.  
26  
27 *International Journal for Quality in Health Care* 2001;13(6):475-80.  
28  
29 44. Brook R, McGlynn E, Shekelle P. Defining and measuring quality of care: a perspective from US  
30  
31 researchers. *International Journal for Quality in Health Care* 2000;12(4):281-95.  
32  
33 45. Øvretveit J, Gustafson D. Evaluation of quality improvement programmes. *Quality and Safety in*  
34  
35 *Health Care* 2002;11(3):270-75.  
36  
37 46. Doyle G, Grampp C. The Cost of Implementing Accreditation: What are the benefits? Final Report  
38  
39 of the Retrospective Study. Health Information and Quality Authority: Irish Health Services  
40  
41 Accreditation Board, 2008.  
42  
43 47. Fujiwara.D, Campbell. R. Valuation Techniques for Social Cost-Benefit Analysis: Stated  
44  
45 Preference, Revealed Preference and Subjective Well-Being Approaches. A Discussion of the  
46  
47 Current Issues. London: Department for Work and Pensions, HM Treasury, 2011.  
48  
49 48. Hinchcliff R, Greenfield D, Moldovan M, Pawsey M, Mumford V, Westbrook JI, et al. Evaluation of  
50  
51 current Australian health service accreditation processes (ACCREDIT-CAP): Protocol for a mixed-  
52  
53 method research project. *BMJ Open* 2012;2(4).  
54  
55 49. Greenfield D, Hinchcliff R, Moldovan M, Mumford V, Pawsey M, Irene Westbrook J, et al. A  
56  
57 multimethod research investigation of consumer involvement in Australian health service  
58  
59 accreditation programmes: the ACCREDIT-SCI study protocol. *BMJ Open* 2012;2(5).  
60  
60 50. Australian Research Council. Linkage Projects. Canberra: Commonwealth of Australia, 2012.

- 1  
2  
3 51. University of New South Wales. Operations Manual for the Human Research Ethics Committee  
4 (HREC), Sydney: UNSW,2010.
- 5  
6 52. Bender DE, Ewbank D. The focus group as a tool for health research: issues in design and  
7 analysis. *Health transition review : the cultural, social, and behavioural determinants of health*  
8 1994;4(1):63-80.
- 9  
10 53. The SROI Network. A Guide to Social Return on Investment. London: UK Cabinet Office, 2012.
- 11  
12 54. Bukonda N, Tavrow P, Abdallah H, Hoffner K, Tembo J. Implementing a national hospital  
13 accreditation program: The Zambian experience. *International Journal for Quality in Health Care*  
14 2002;14(SUPPL. 1):7-16.
- 15  
16 55. National Health Performance Authority. National Health Reform: Performance and Accountability  
17 Framework. Canberra: NHPA, 2012.
- 18  
19 56. Australian Institute for Health and Welfare. A Set of Performance Indicators across the health and  
20 aged care system. Canberra: AIHW, 2008
- 21  
22 57. Australian Institute for Health and Welfare & Australian Commission on Safety and Quality in  
23 Health Care. Sentinel events in Australian public hospitals 2004-2005. Canberra: AIHW, 2007
- 24  
25 58. Jackson TJ, Michel JL, Roberts RF, Jorm CM, Wakefield JG. A classification of hospital-acquired  
26 diagnoses for use with routine hospital data. *Medical Journal of Australia* 2009;191(10):544-48.
- 27  
28 59. Jackson T, Nghiem HS, Rowell D, Jorm C, Wakefield J. Marginal costs of hospital-acquired  
29 conditions: information for priority-setting for patient safety programmes and research. *Journal of*  
30 *Health Services Research & Policy* 2011;16(3):141-46.
- 31  
32 60. National Health and Medical Research Council. How to Compare the costs and benefits:  
33 evaluation of the economic evidence. Canberra: Commonwealth of Australia, 2001
- 34  
35 61. National Health and Medical Research Council of Australia. National Statement on Ethical  
36 Conduct in Human Research. Canberra: NHMRC, 2007 (updated 2009).
- 37  
38 62. University of New South Wales A. Research Code of Conduct: Version 1.0 Effective 27 April  
39 2009.
- 40  
41  
42  
43  
44  
45  
46  
47  
48  
49  
50  
51  
52  
53  
54  
55  
56  
57  
58  
59  
60
